# Supplementary material for: Synthesis, Characterization, and Antimicrobial Studies of Novel Series of 2,4-Bis(hydrazino)-6-substituted-1,3,5-triazine and Their Schiff Base Derivatives
Source: Hindawi journal article supplement (doi:10.1155/2018/8507567), 2018-01-01
Supplement: f1 [file 8507567.f1.docx]

**Supplementary File**

**Synthesis, Characterization and Antimicrobial Studies of Novel Series of 2,4-*bis*(hydrazino)-6-substituted-1,3,5-Triazine and Their Schiff Base Derivatives**

Hessa H. Al-Rasheed, Essam N. Sholkamy, Monirah Al Alshaikh, Mohammed R. H. Siddiqui , Ahmed S. Al-Obaidi and Ayman El-Faham*

**Table of content**

**Figure S1: 1H NMR and 13 C NMR for 4a**

**Figure S2: 1H NMR and 13 C NMR for 4b**

**Figure S3: 1H NMR and 13 C NMR for 4c**

**Figure S4: 1H NMR and 13 C NMR for 4d**

**Figure S5: 1H NMR and 13 C NMR for 4e**

**Figure S6: 1H NMR and 13 C NMR for 4f**

**Figure S7: 1H NMR and 13 C NMR for 4g**

**Figure S8: 1H NMR and 13 C NMR for 4h**

**Figure S9: 1H NMR and 13 C NMR for 4i**

**Figure S10: 1H NMR and 13 C NMR for 4j**

**Figure S11: 1H NMR and 13 C NMR for 4k**

**Figure S12: 1H NMR and 13 C NMR for 4l**

**Figure S13: 1H NMR and 13 C NMR for 4m**

**Figure S14: 1H NMR and 13 C NMR for 5a**

**Figure S15: 1H NMR and 13 C NMR for 5b**

**Figure S16: 1H NMR for 5c**

**Figure S17: 1H NMR and 13 C NMR for 5d**

**Figure S18: 1H NMR and 13 C NMR for 5e**

**Figure S19: 1H NMR and 13 C NMR for 5f**

**Figure S20: 1H NMR and 13 C NMR for 5g**

**Figure S21: 1H NMR and 13 C NMR for 5h**

**Figure S22: 1H NMR and 13 C NMR for 5i**

**Figure S23: 1H NMR and 13 C NMR for 6a**

**Figure S24: LC-MS for 6a**

**Figure S25: 1H NMR and 13 C NMR for 6b**

**Figure S26: 1H NMR and 13 C NMR for 6c**

**Figure S27: 1H NMR and 13 C NMR for 6d**

**Figure S28: 1H NMR and 13 C NMR for 6e**

**Figure S29: 1H NMR and 13 C NMR for 6f**

**Figure S30: 1H NMR and 13 C NMR for 6g**

**Figure S31: 1H NMR and 13 C NMR for 6h**

**Figure S32: 1H NMR and 13 C NMR for 6i**

**Figure S33: 1H NMR and 13 C NMR for 7a**

**Figure S34: 1H NMR and 13 C NMR for 7b**

**Figure S35: 1H NMR and 13 C NMR for 7c**

**Figure S36: 1H NMR for 7d**

**Figure S37: 1H NMR and 13 C NMR for 7e**

**Figure S38: 1H NMR and 13 C NMR for 7f**

**Figure S39: 1H NMR and 13 C NMR for 7g**

**Figure S40: 1H NMR and 13 C NMR for 7h**

**Figure S41: 1H NMR and 13 C NMR for 7i**

**Figure S42: LC-MS for 7i**

**Figure S43: 1H NMR and 13 C NMR for 8a**

**Figure S44: 1H NMR and 13 C NMR for 8b**

**Figure S45: 1H NMR and 13 C NMR for 8c**

**Figure S46: 1H NMR and 13 C NMR for 8d**

**Figure S47: 1H NMR and 13 C NMR for 8e**

**Figure S48: 1H NMR and 13 C NMR for 8f**

**Figure S49: 1H NMR and 13 C NMR for 8g**

**Figure S50: LC-MS for 7a**

**Figure S51: LC-MS for 7d**

**Figure S52: LC-MS for 7f**

**Figure S1: Supplementary spectrum for compound 4a (1H and 13C)**


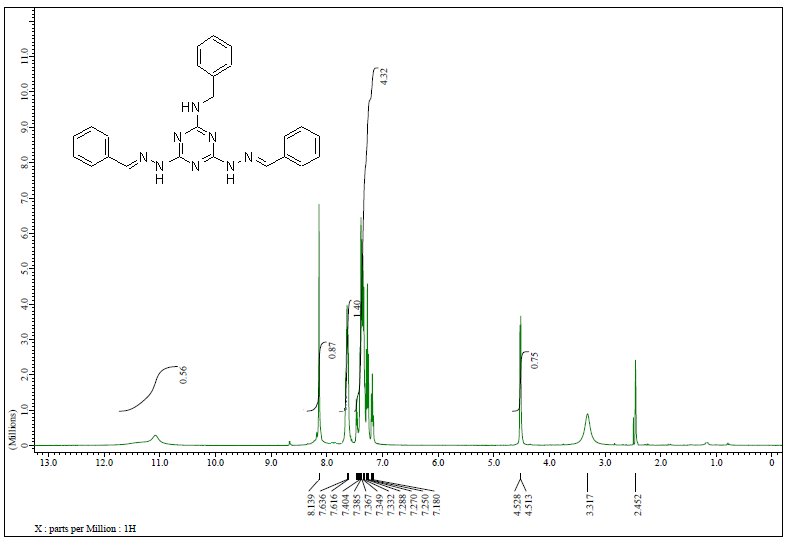


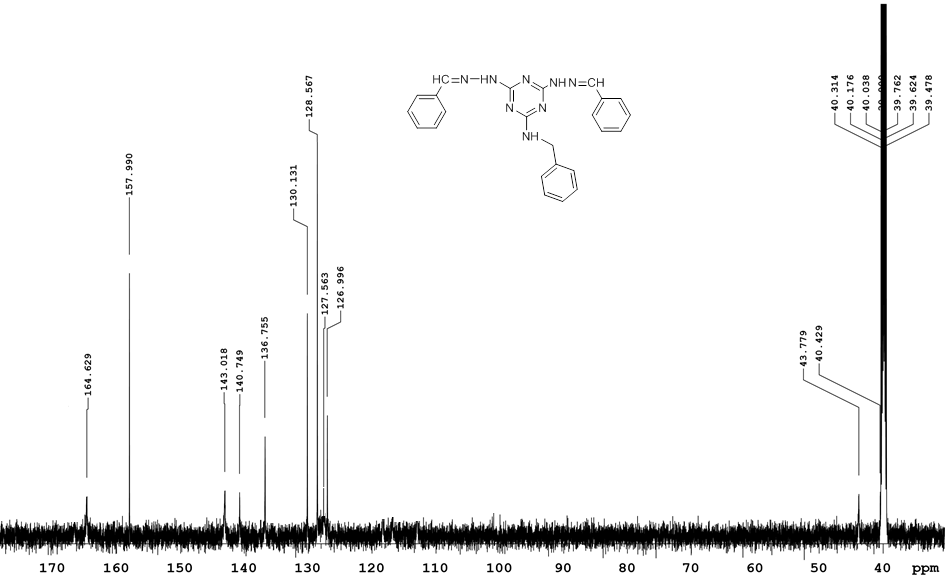


**Figure S2: Supplementary spectrum for compound 4b (1H and 13C)**


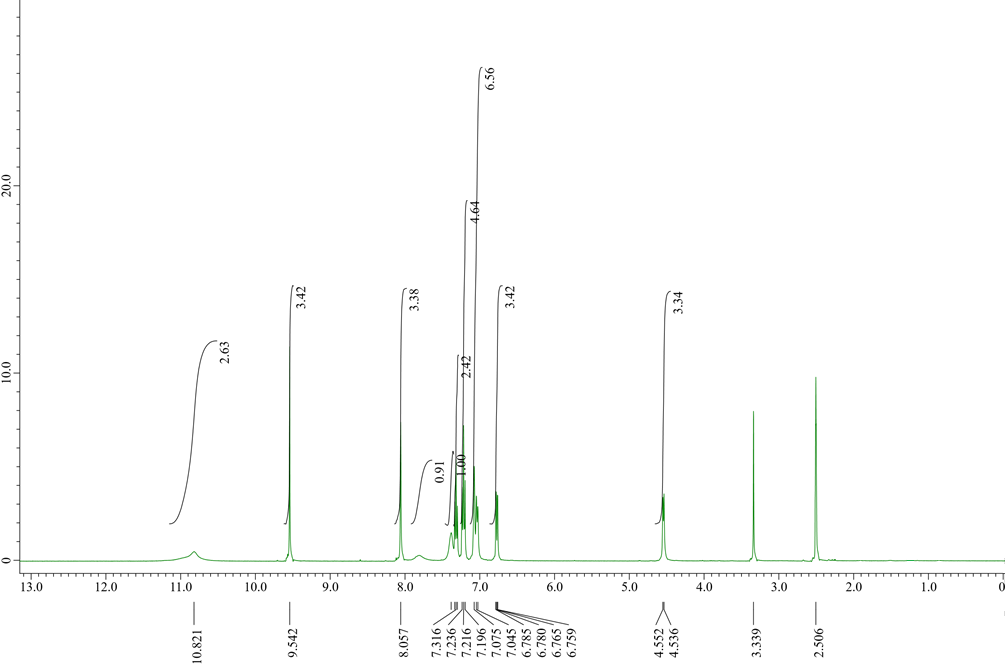


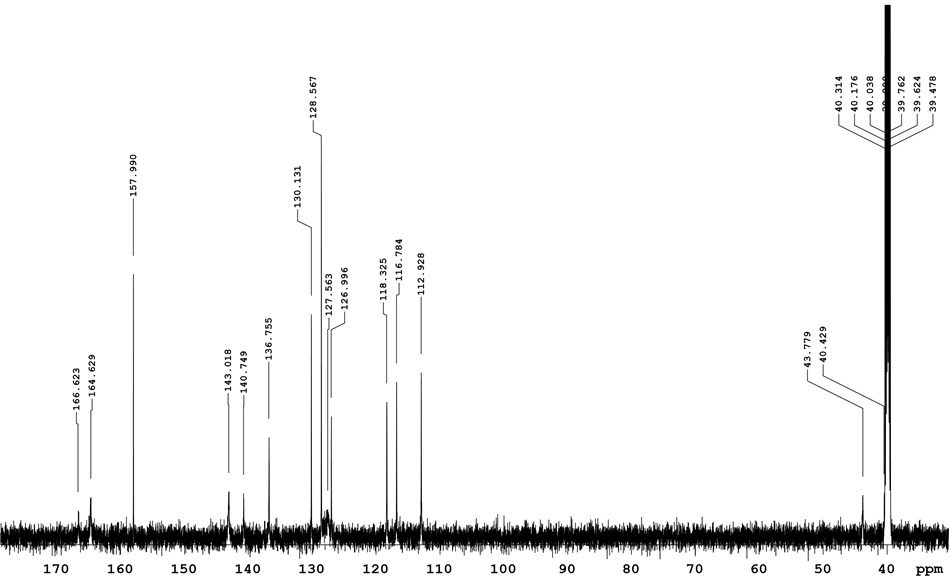


**Figure S3: Supplementary spectrum for compound 4c (1H and 13C)**


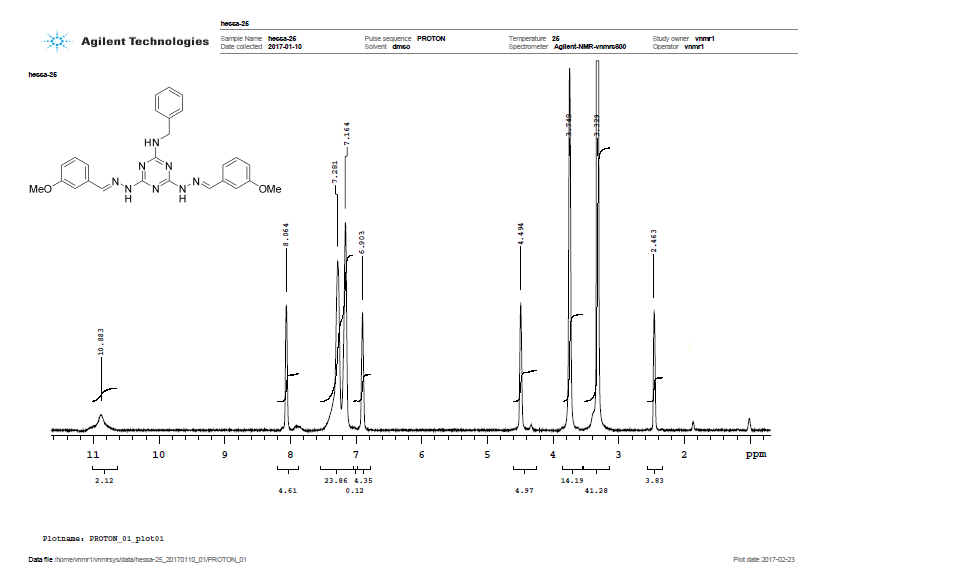


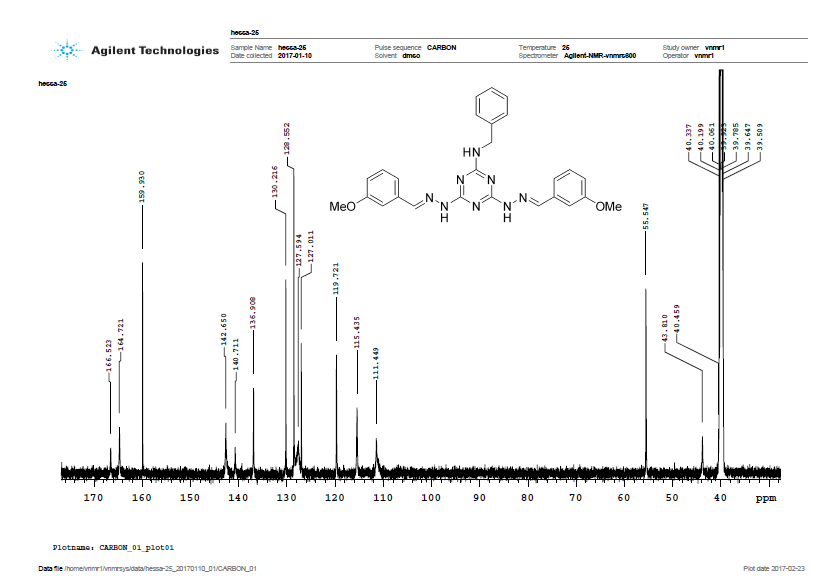


**Figure S4: Supplementary spectrum for compound 4d (1H and 13C)**


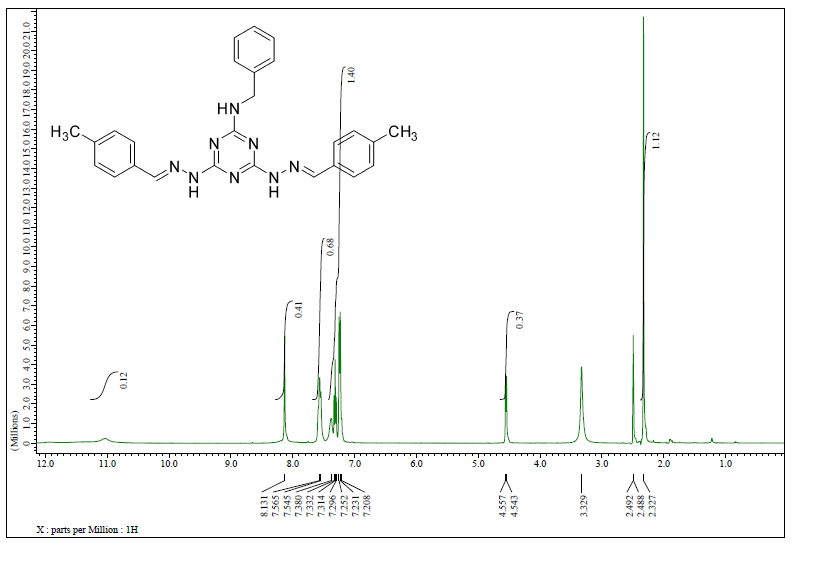


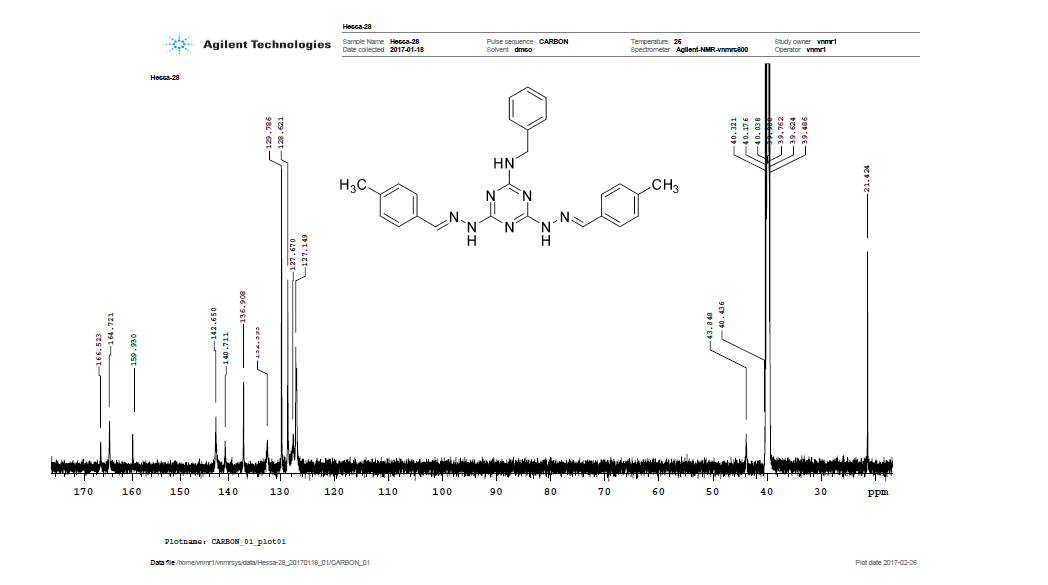


**Figure S5: Supplementary spectrum for compound 4e (1H and 13C)**


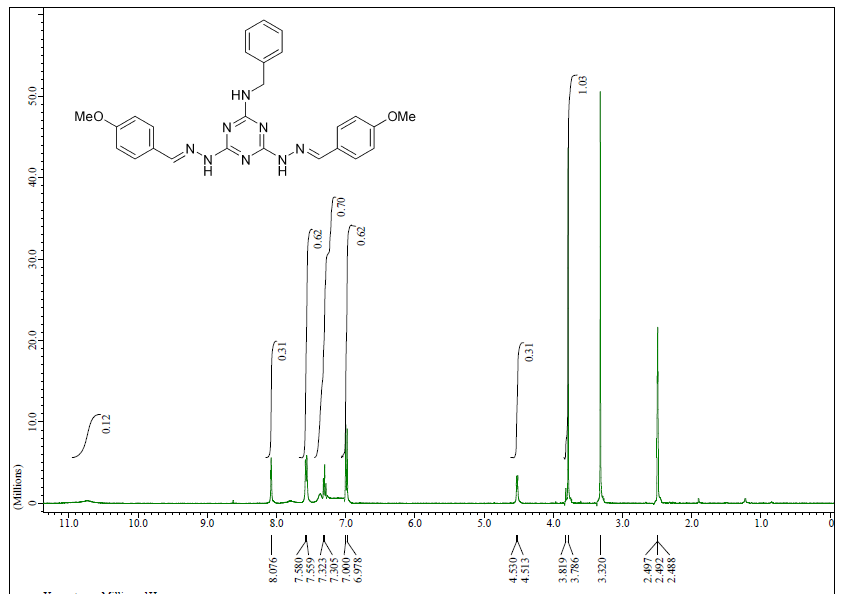


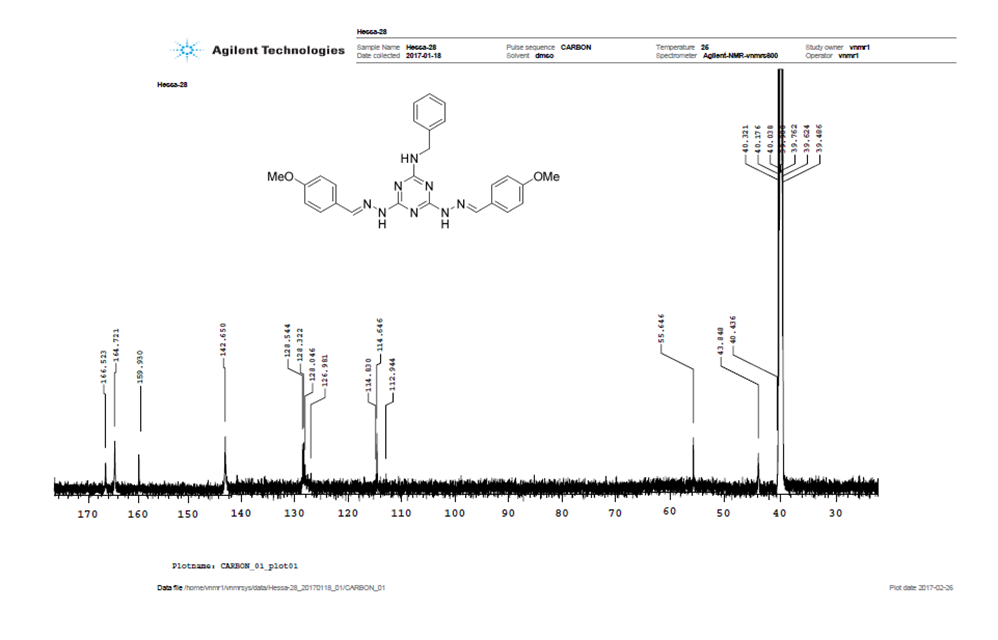


**Figure S6: Supplementary spectrum for compound 4f (1H and 13C)**


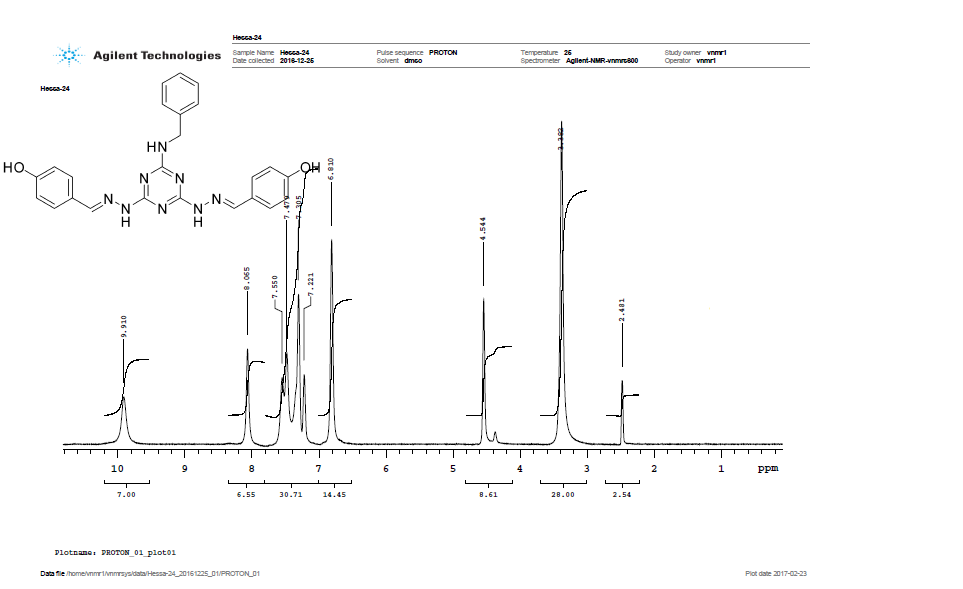


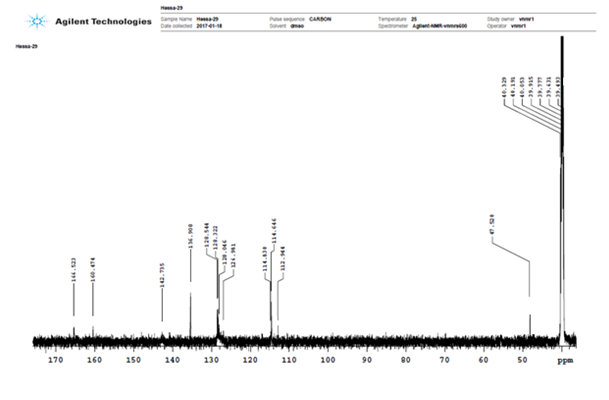


**Figure S7: Supplementary spectrum for compound 4g (1H and 13C)**


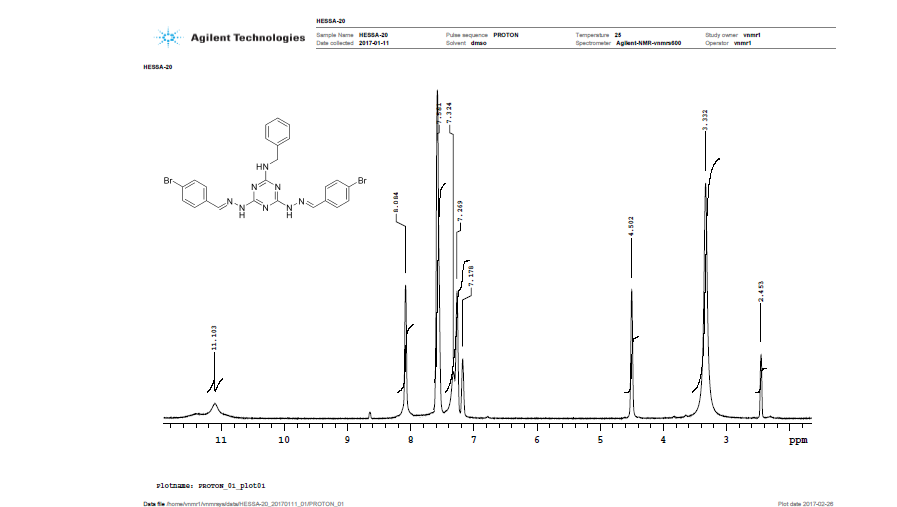


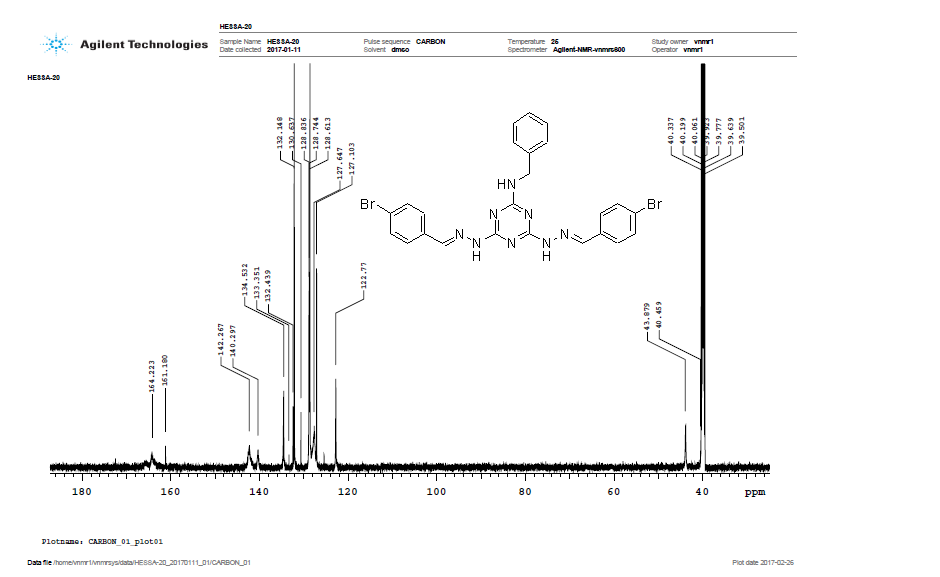


**Figure S8: Supplementary spectrum for compound 4h (1H and 13C)**


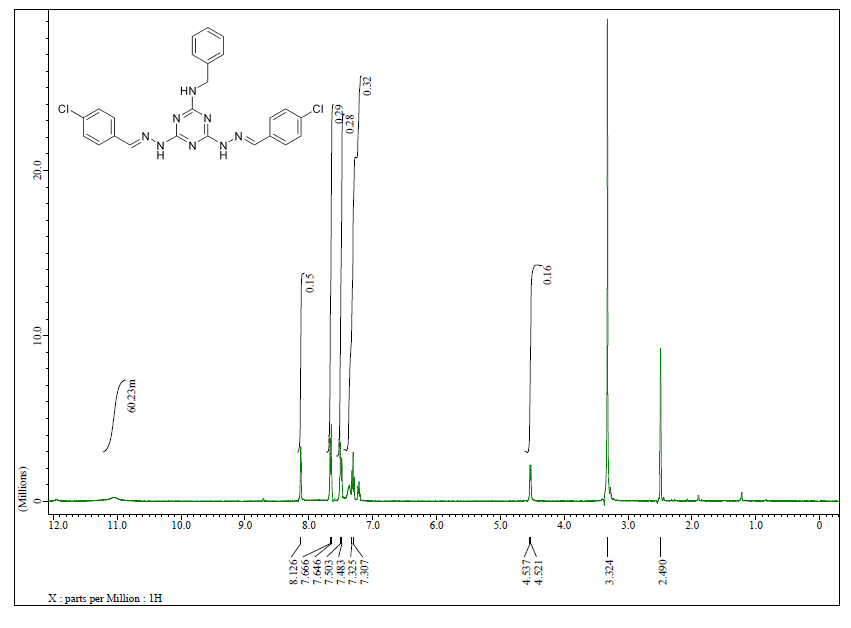


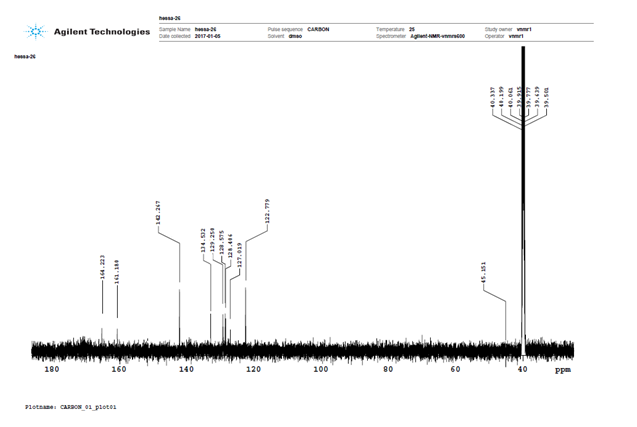


**Figure S9: Supplementary spectrum for compound 4i (1H and 13C)**


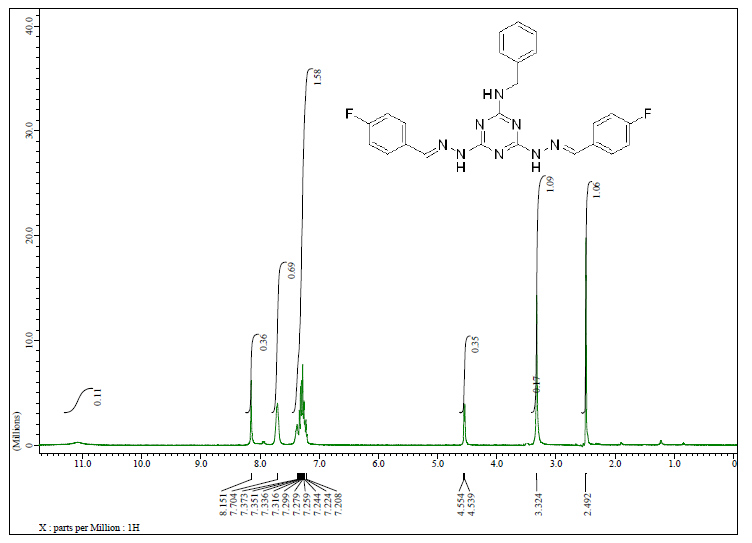


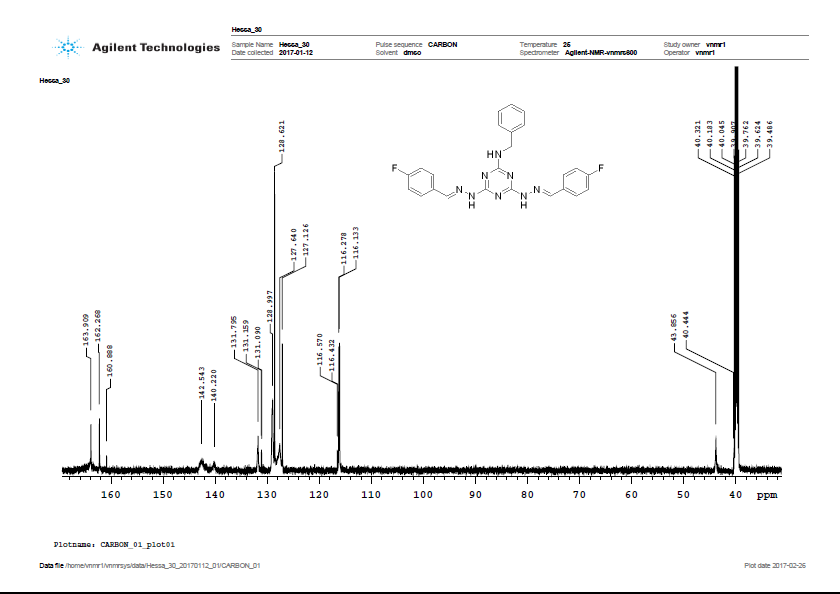


**Figure S10: Supplementary spectrum for compound 4j (1H and 13C)**


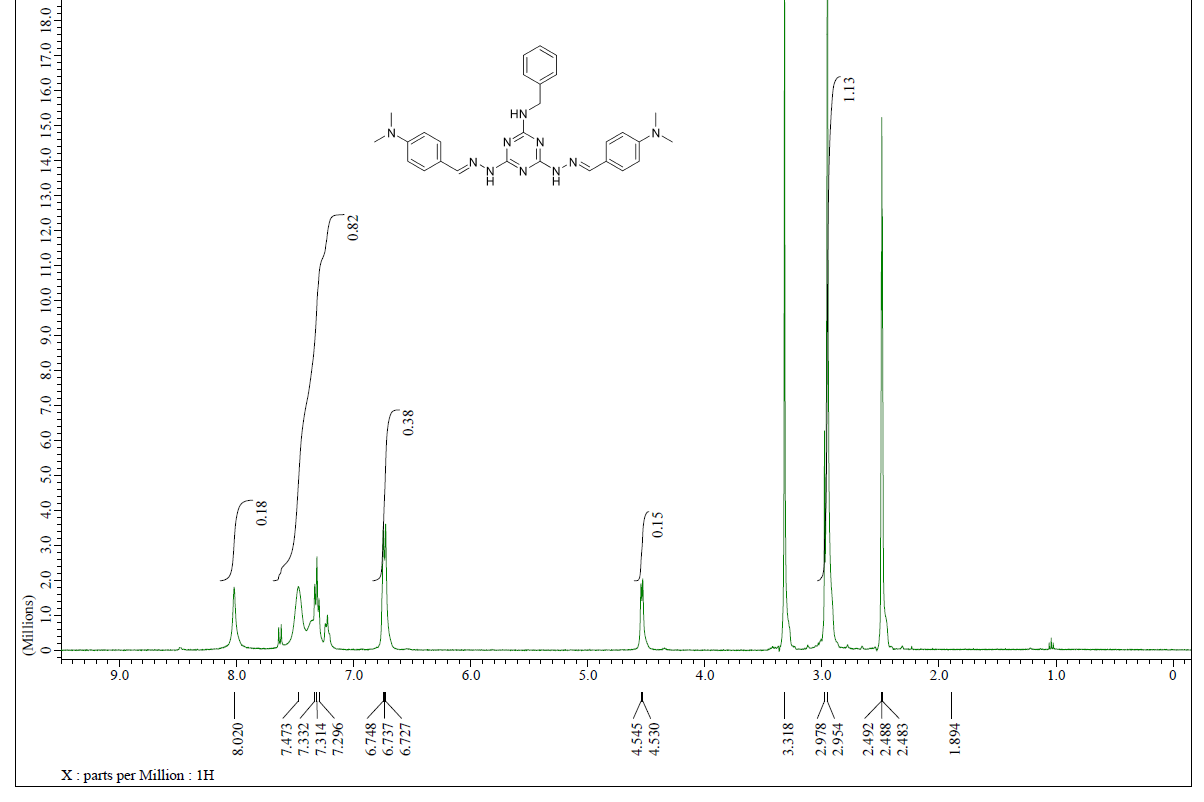


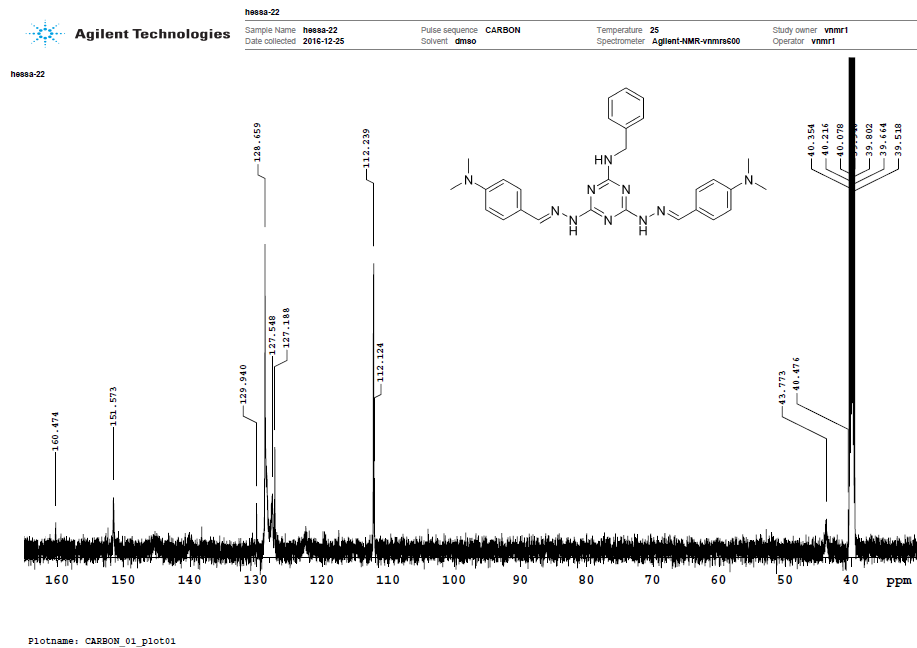


**Figure S11: Supplementary spectrum for compound 4k (1H and 13C)**


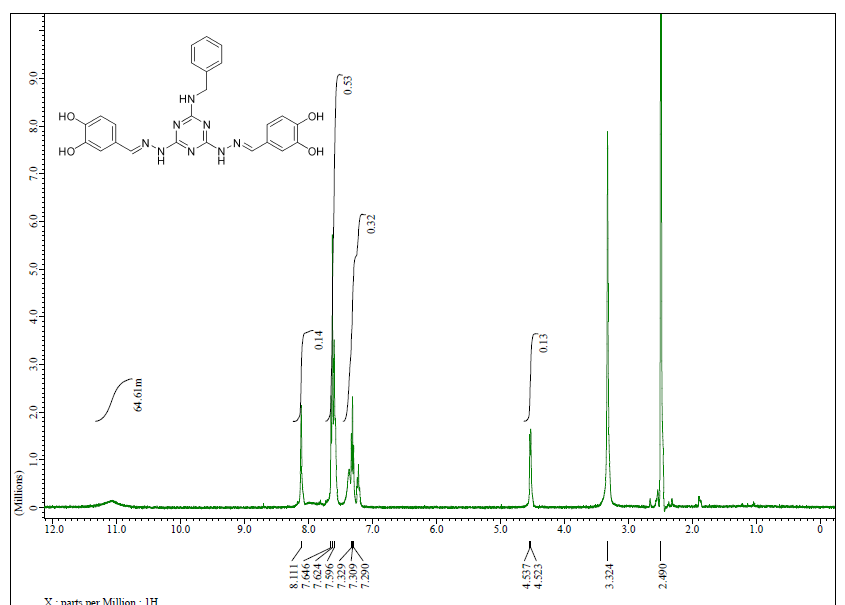


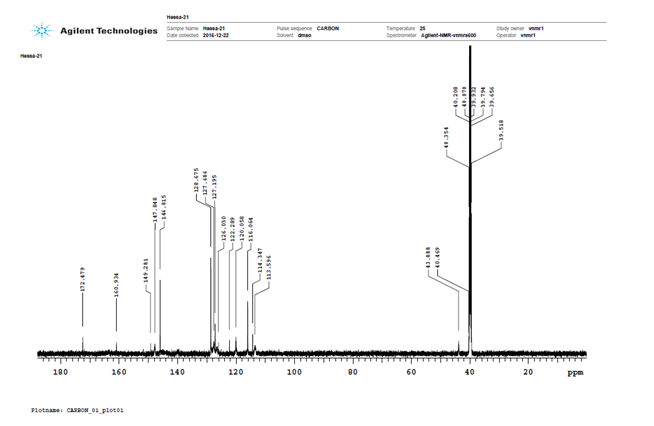


**Figure S12: Supplementary spectrum for compound 4l (1H and 13C)**


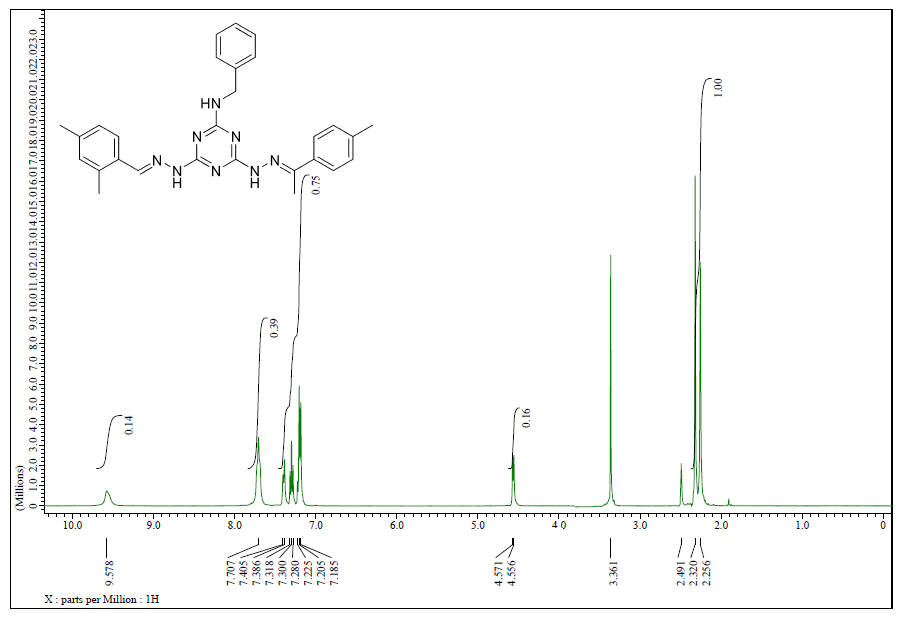


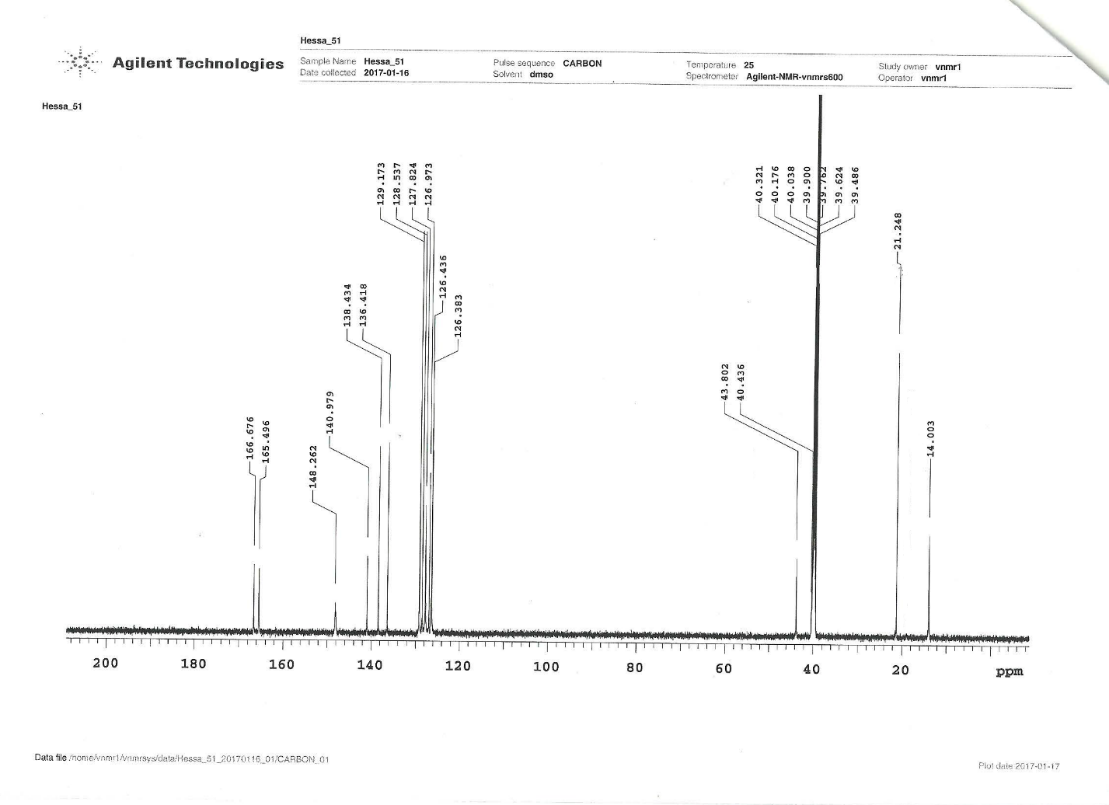


**Figure S13: Supplementary spectrum for compound 4m (1H and 13C)**


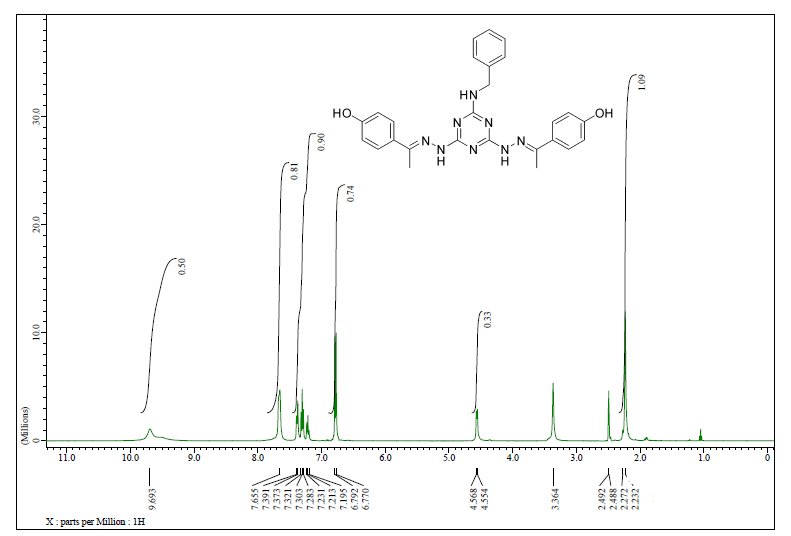


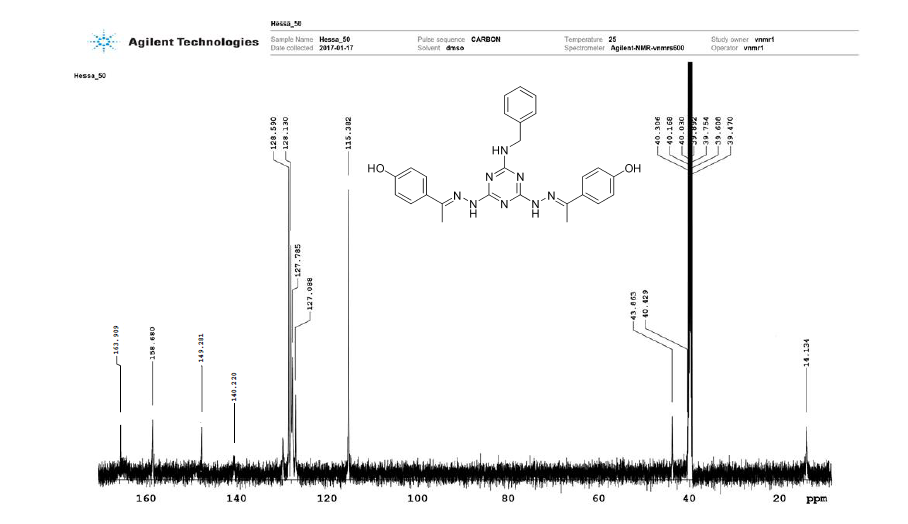


**Figure S14: Supplementary spectrum for compound 5a (1H and 13C)**


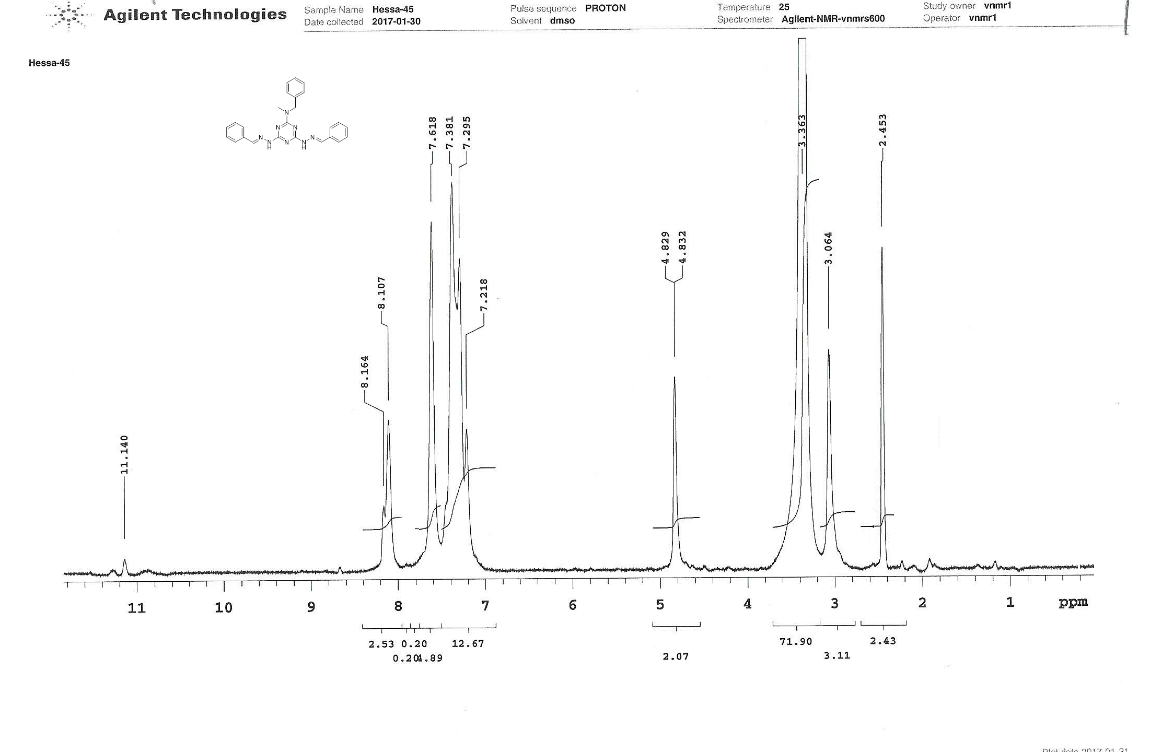


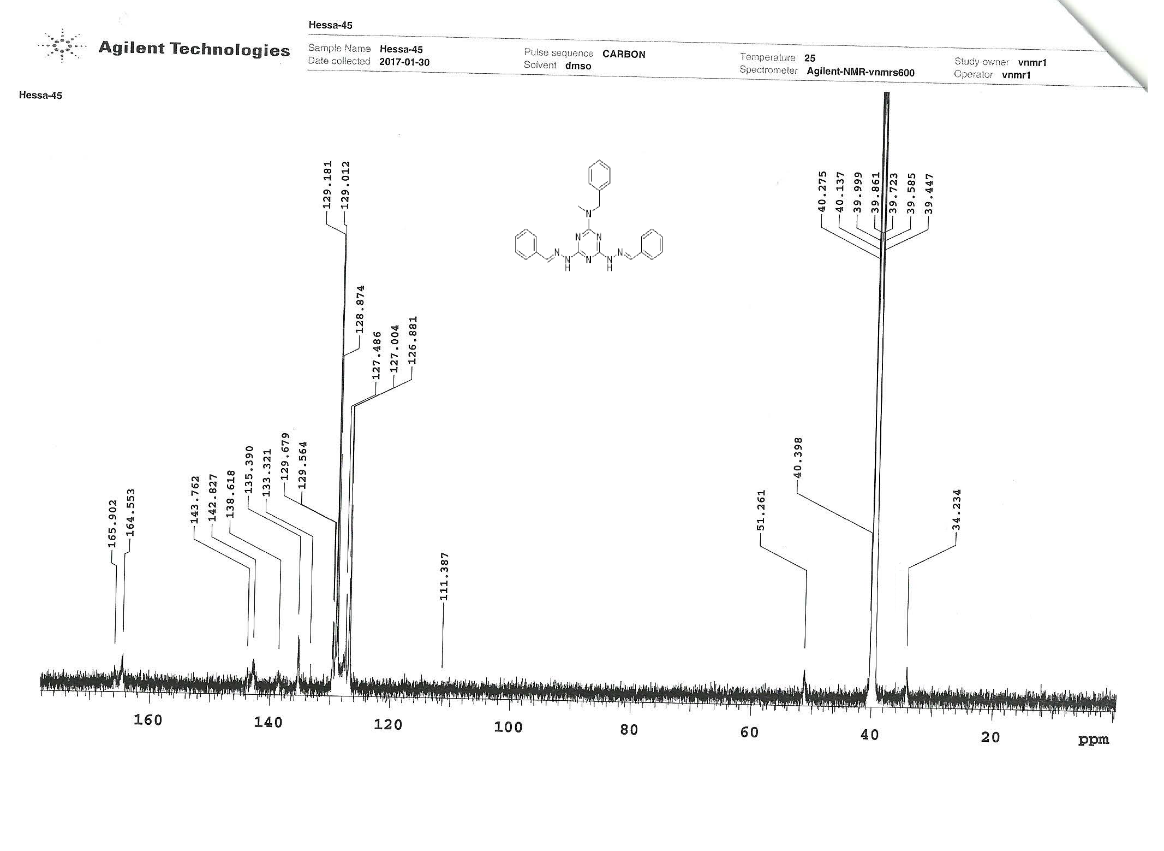


**Figure S15: Supplementary spectrum for compound 5b (1H and 13C)**


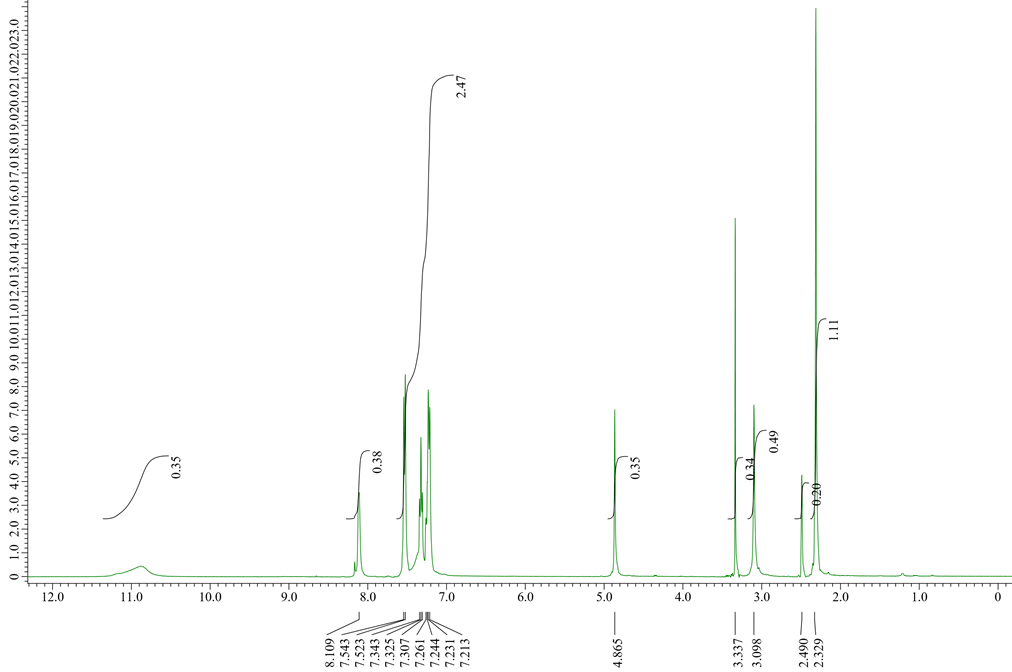


**Figure S16: Supplementary spectrum for compound 5c (1H NMR)**

**
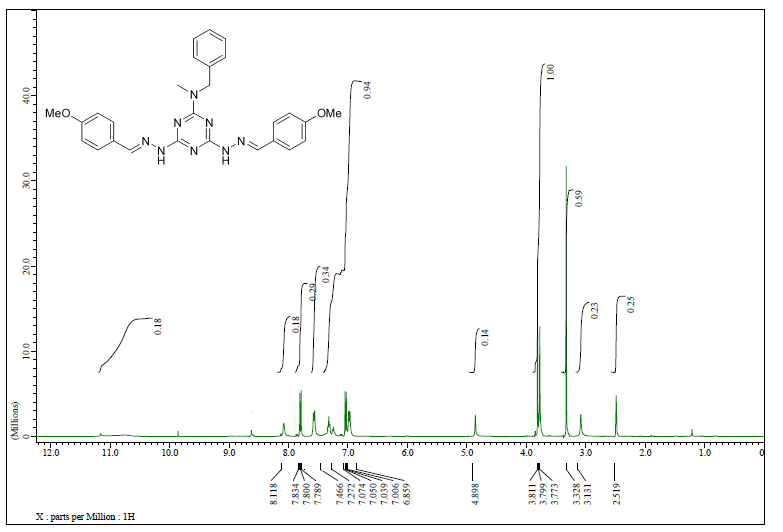
**

**Figure S17: Supplementary spectrum for compound 5d (1H and 13C)**


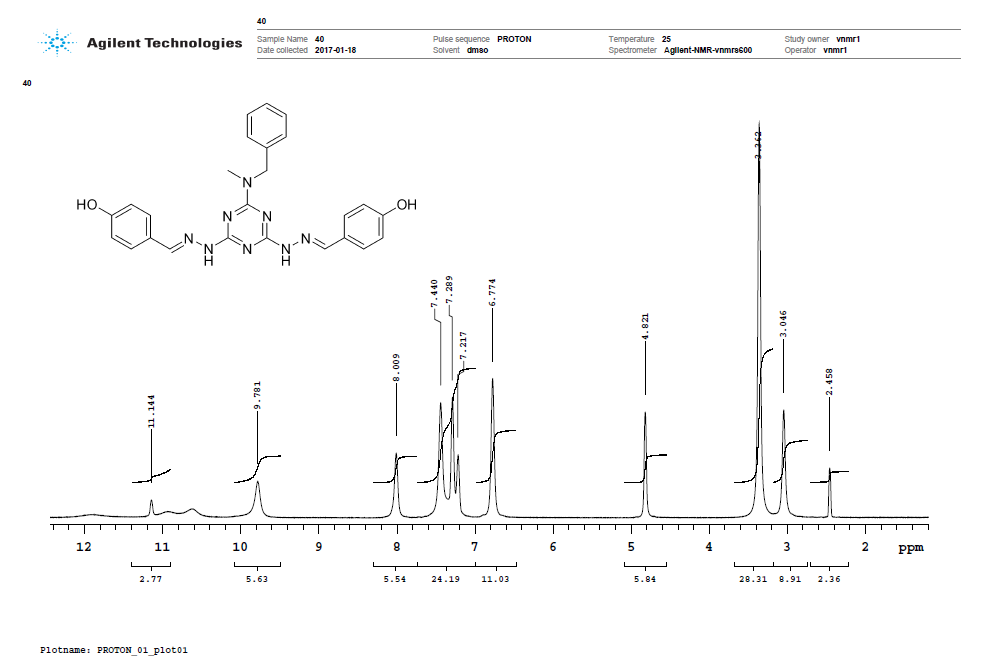


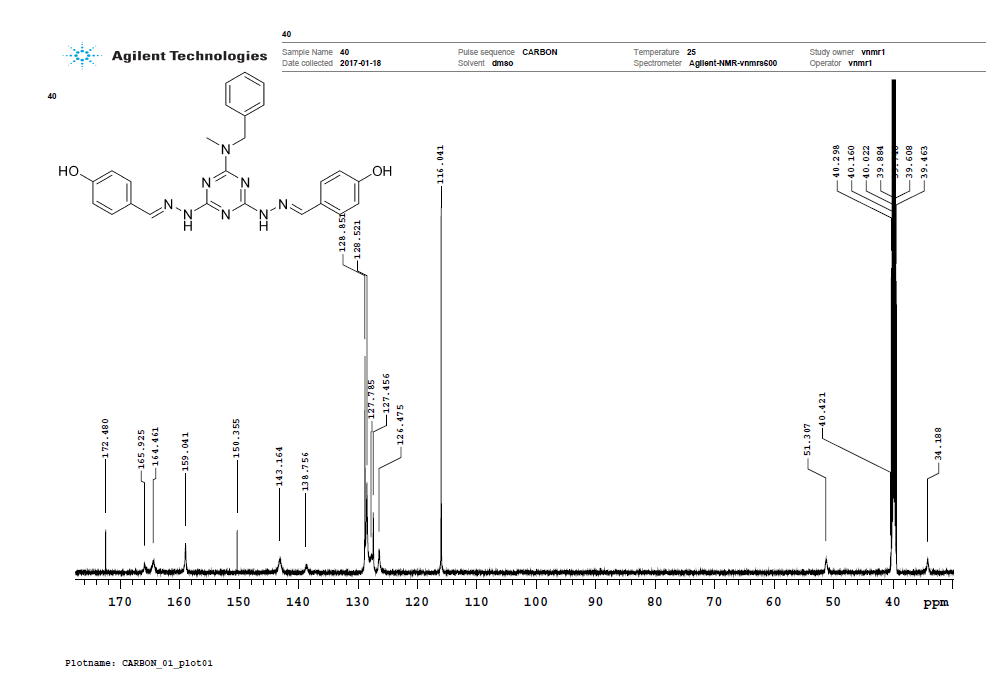


**Figure S18: Supplementary spectrum for compound 5e (1H and 13C)**


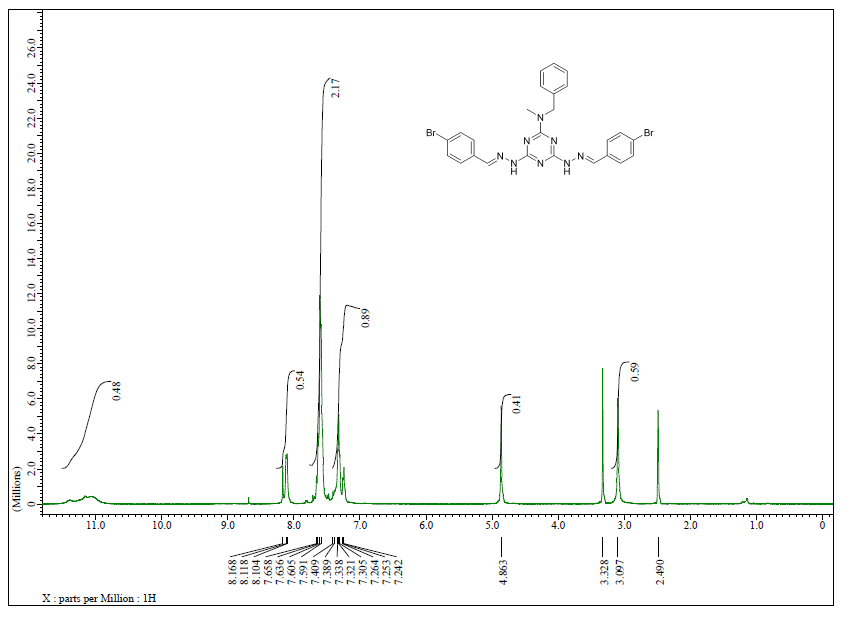


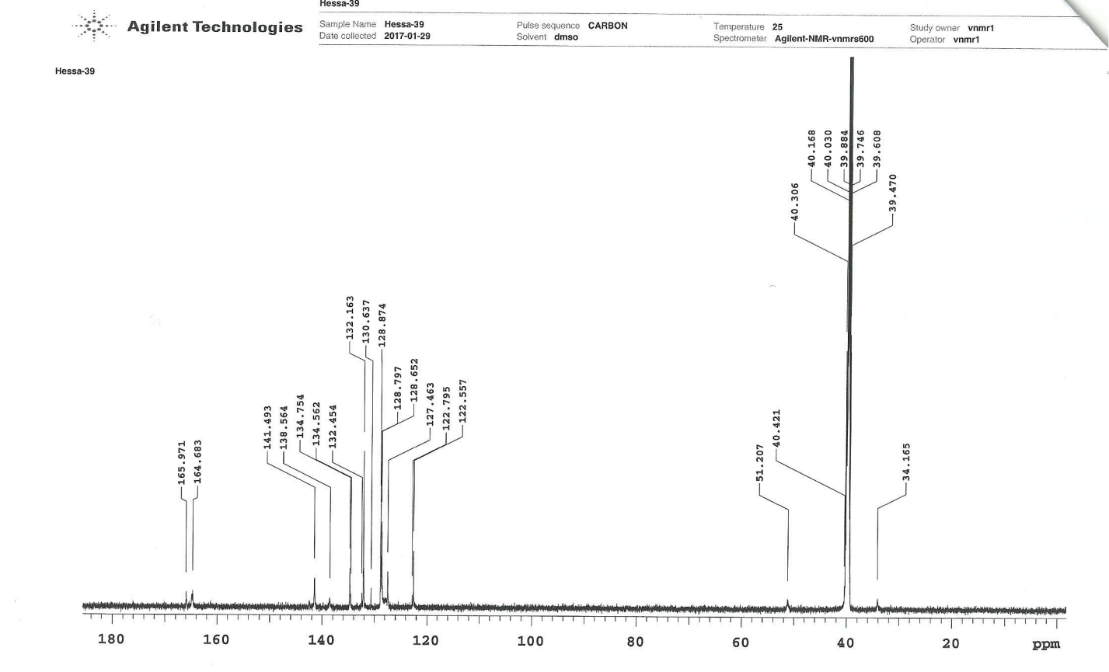


**Figure S19: Supplementary spectrum for compound 5f (1H and 13C)**


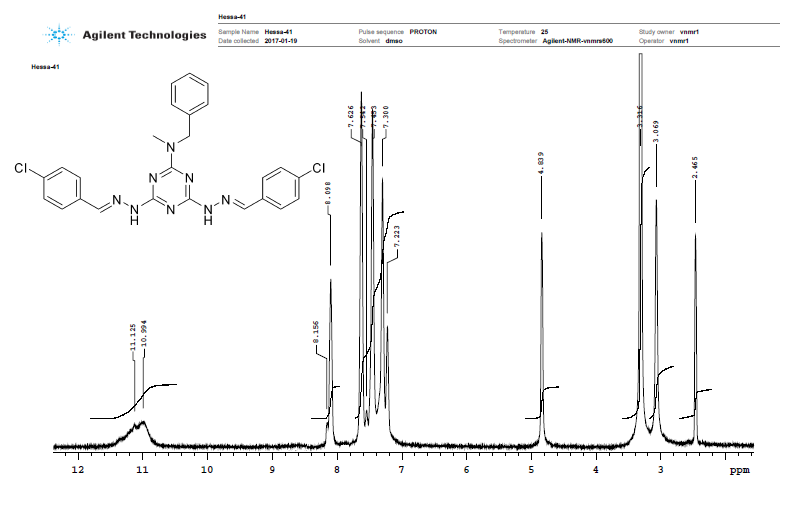


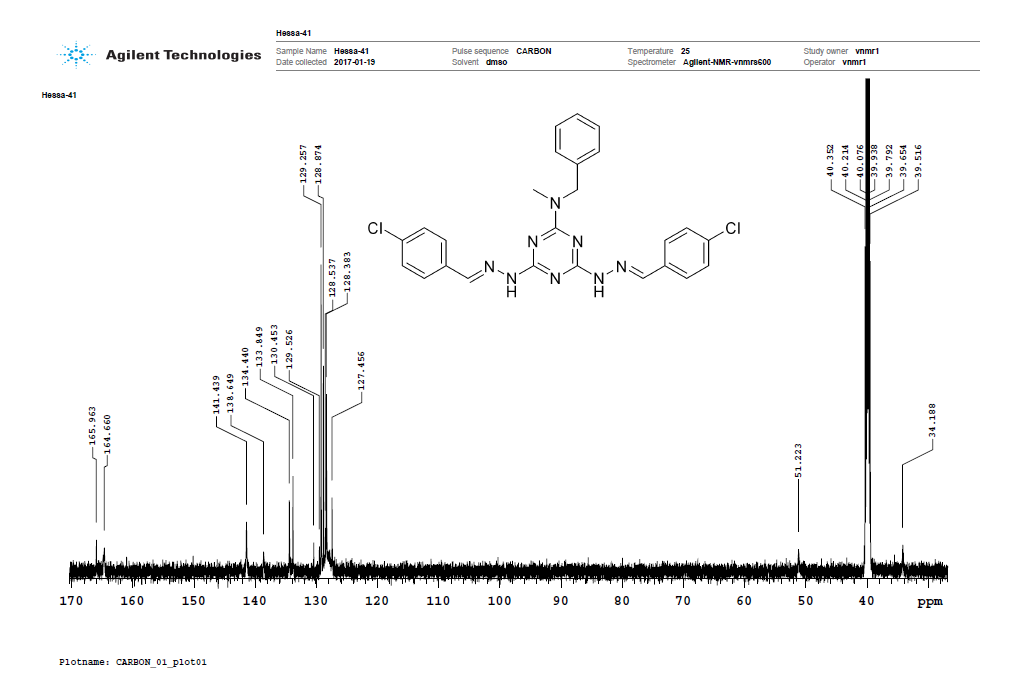


**Figure S20: Supplementary spectrum for compound 5g (1H and 13C)**


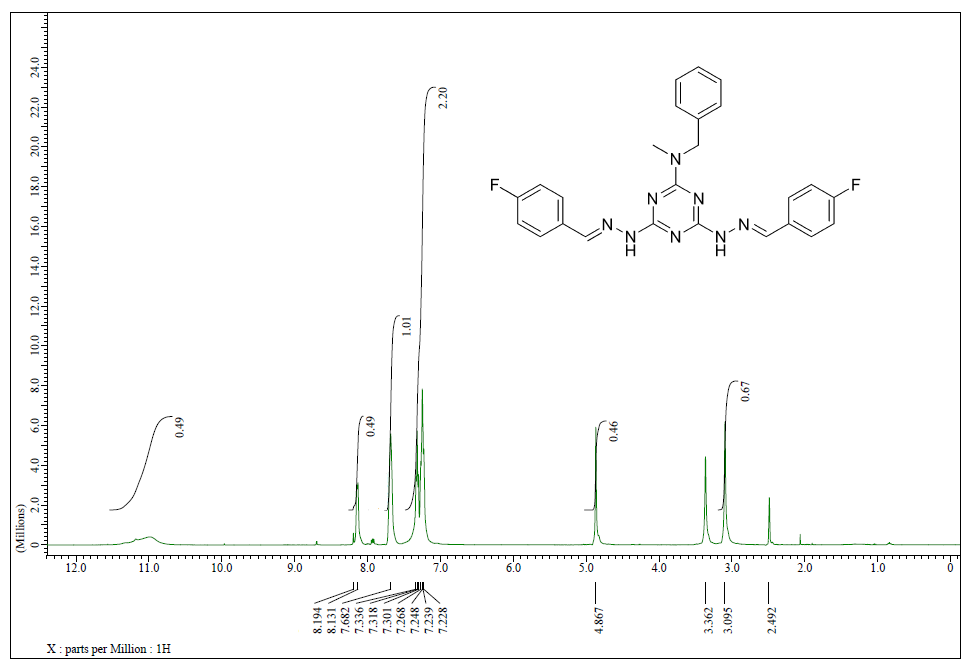


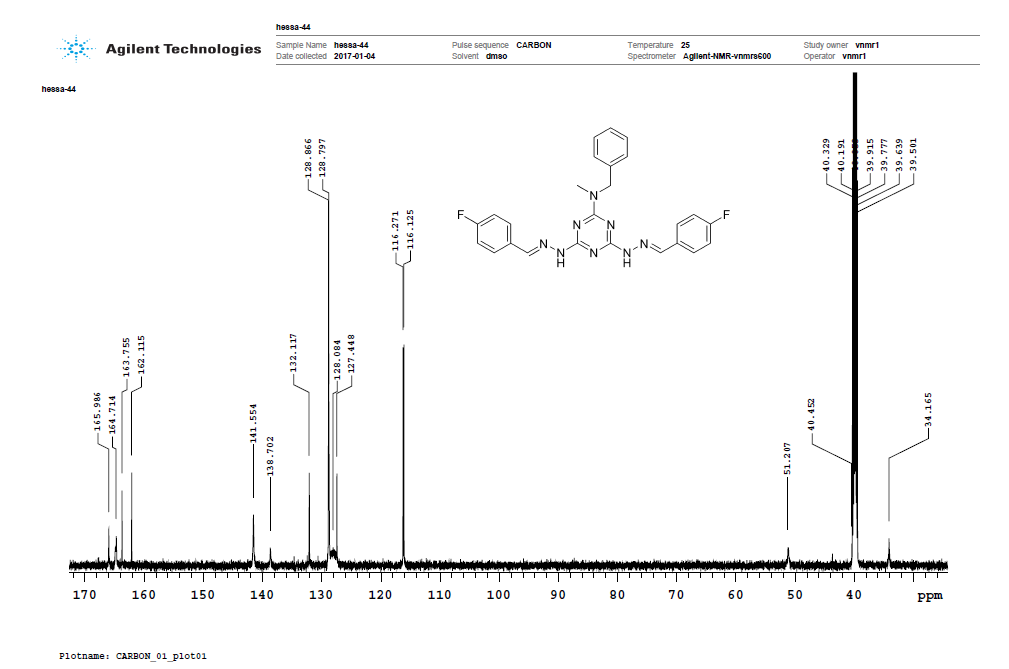


**Figure S21: Supplementary spectrum for compound 5h (1H and 13C)**


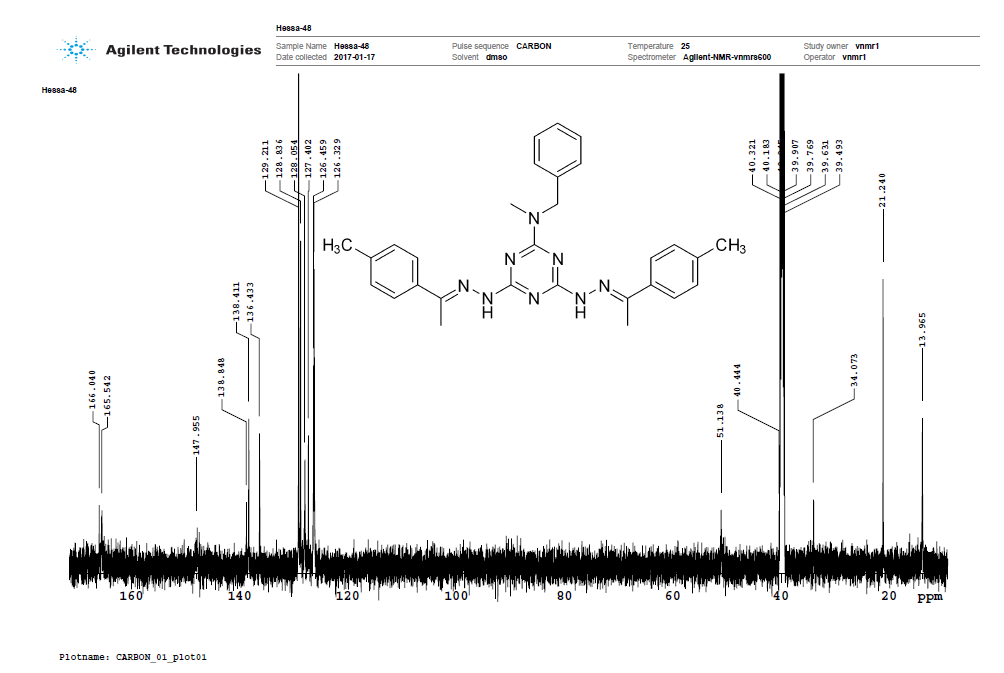


**Figure S22: Supplementary spectrum for compound 5i (1H and 13C)**


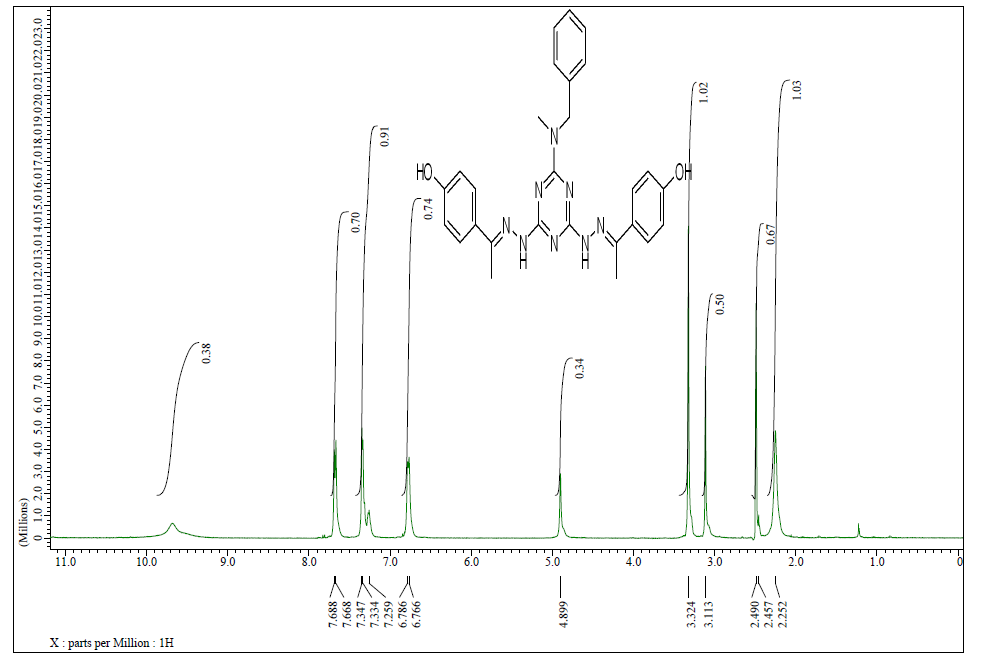


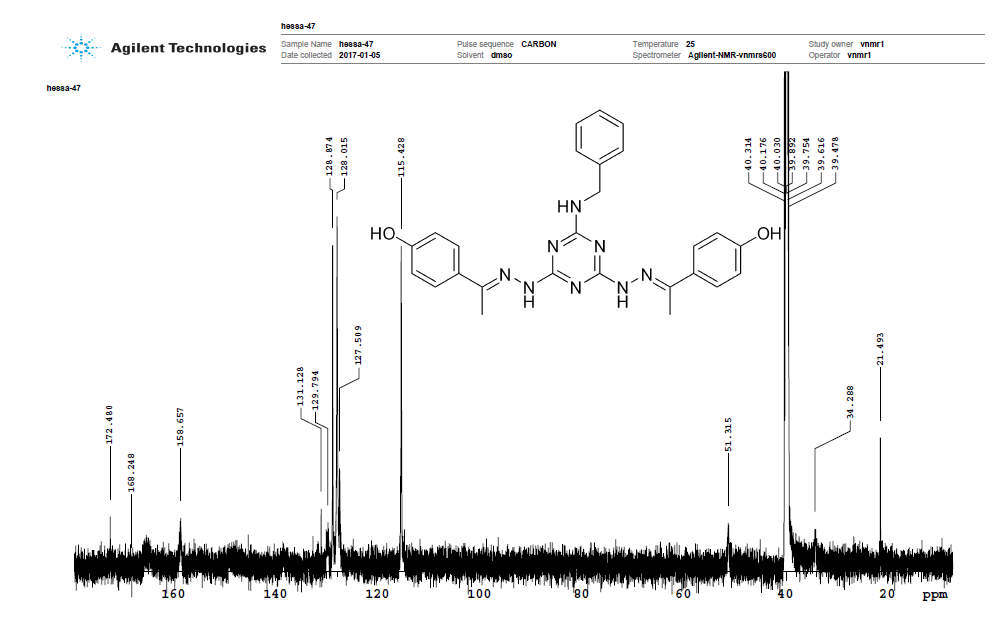


**Figure S23: Supplementary spectrum for compound 6a (1H and 13C)**


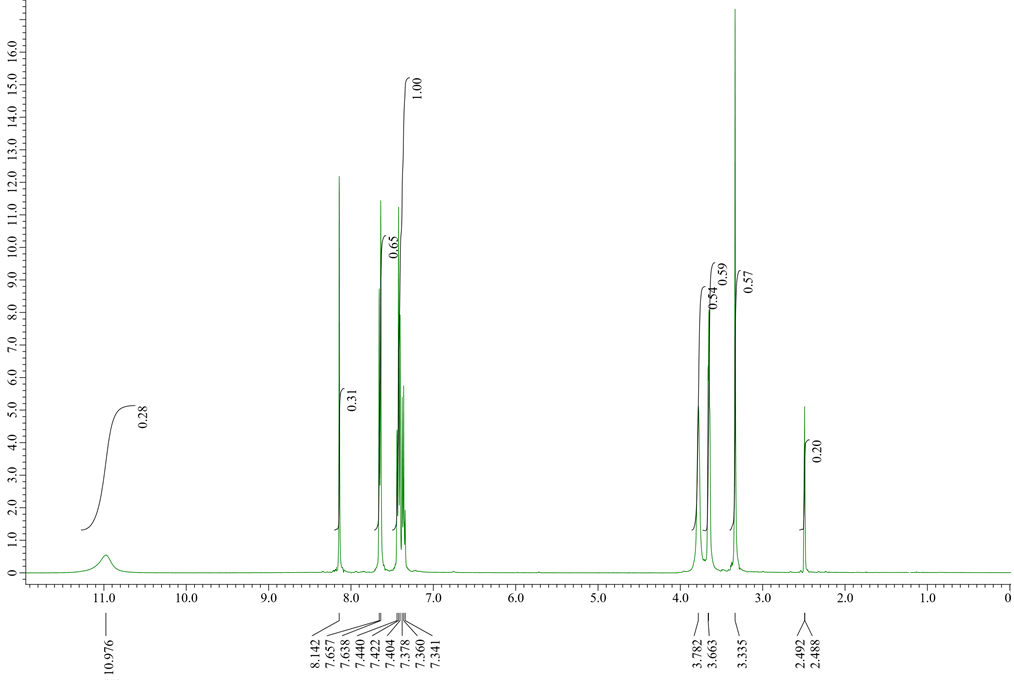


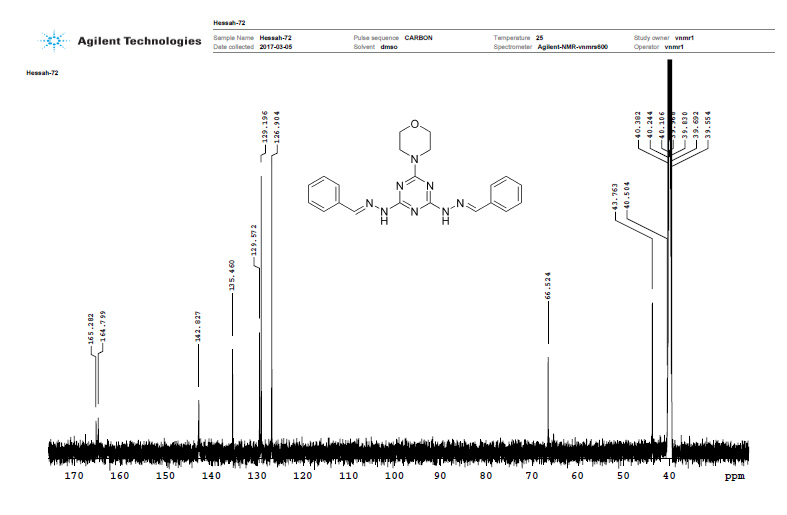


**Figure S24: LC-MS for compound 6a**


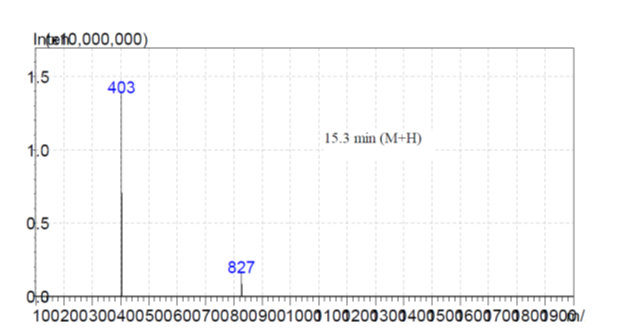


**Figure S25: Supplementary spectrum for compound 6b (1H and 13C)**


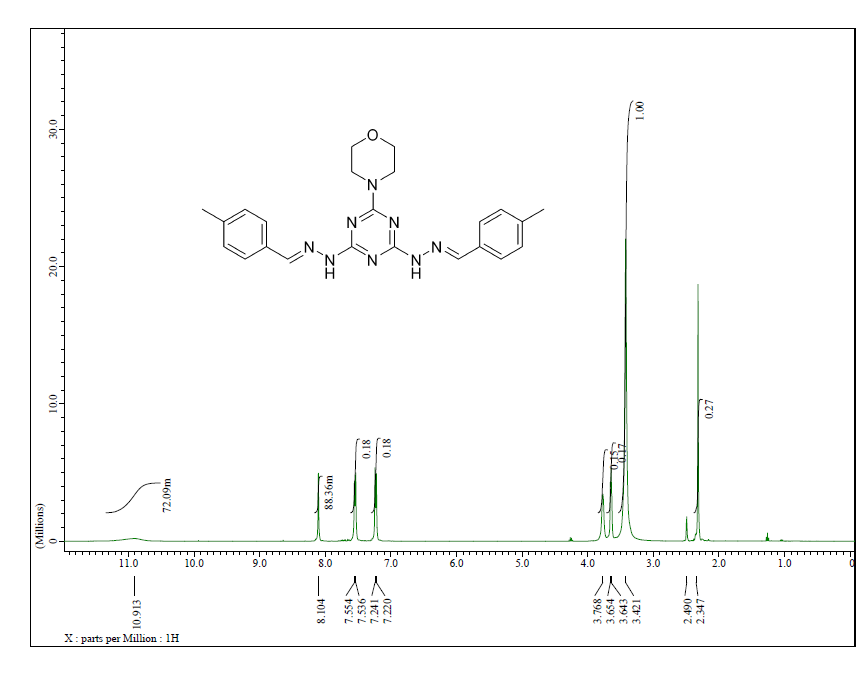


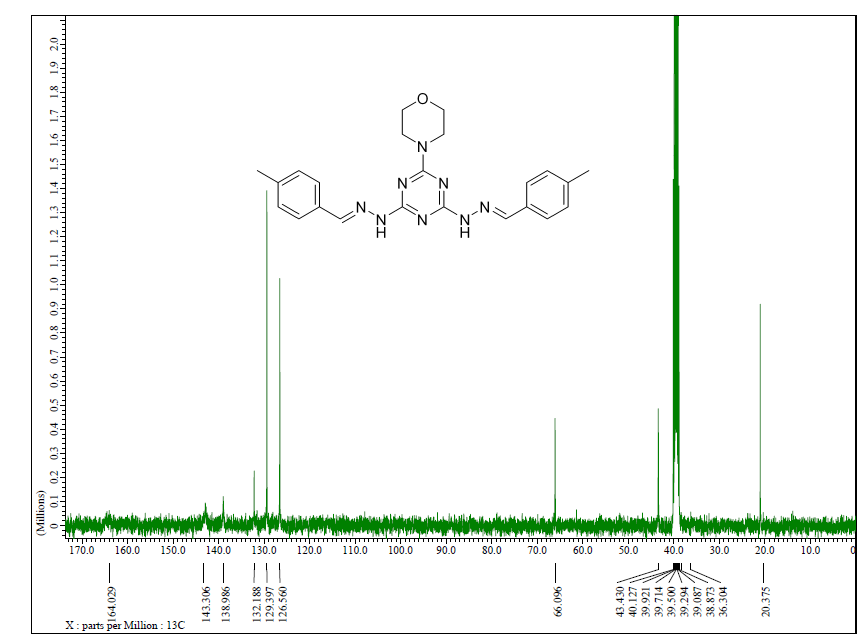


**Figure S26: Supplementary spectrum for compound 6c (1H and 13C)**


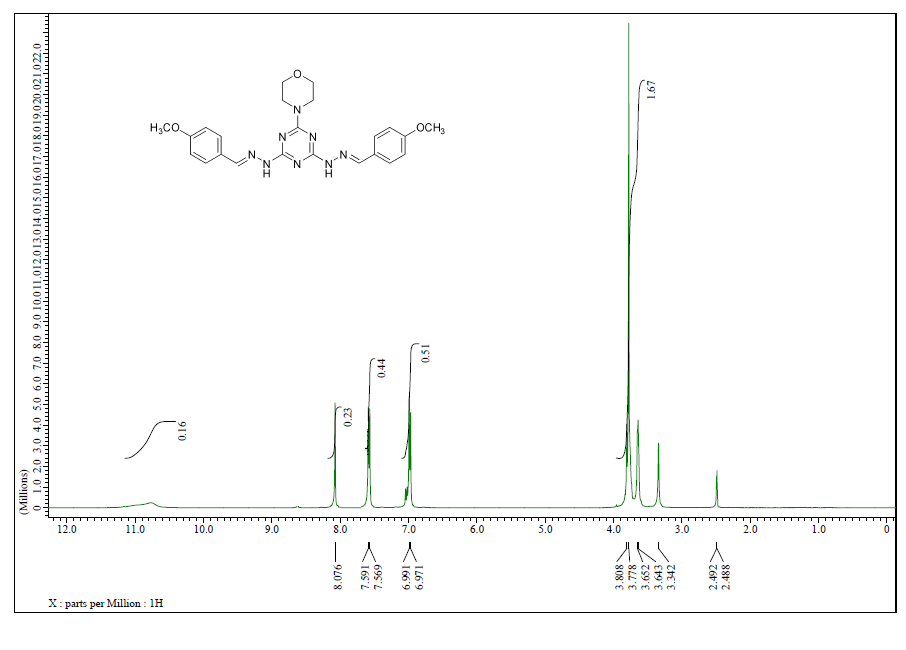


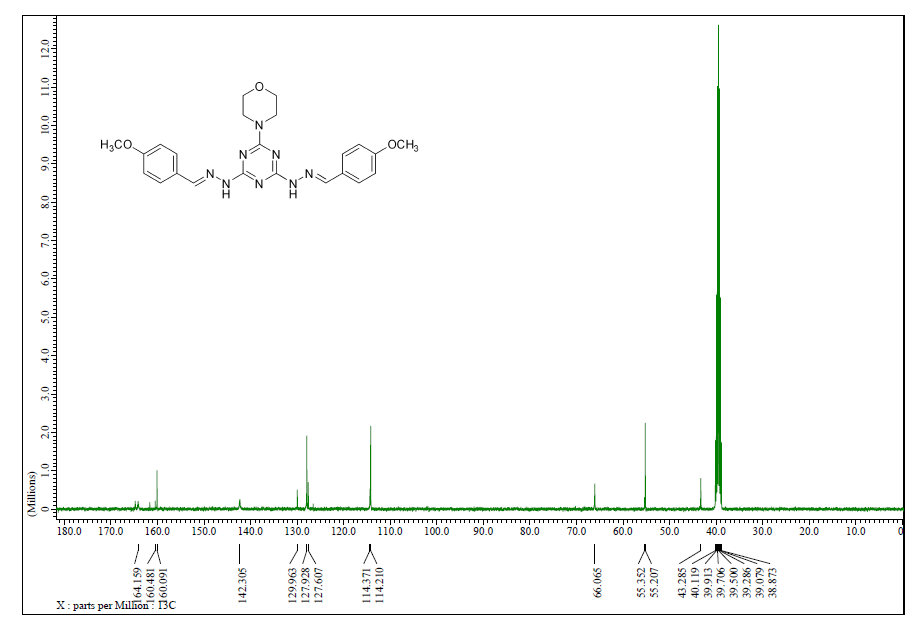


**Figure S27: Supplementary spectrum for compound 6d (1H and 13C)**


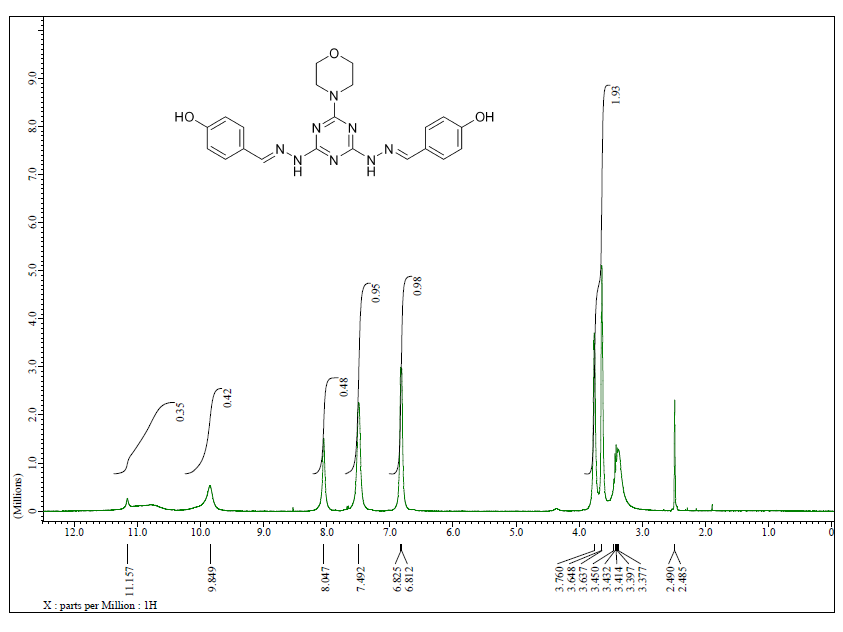


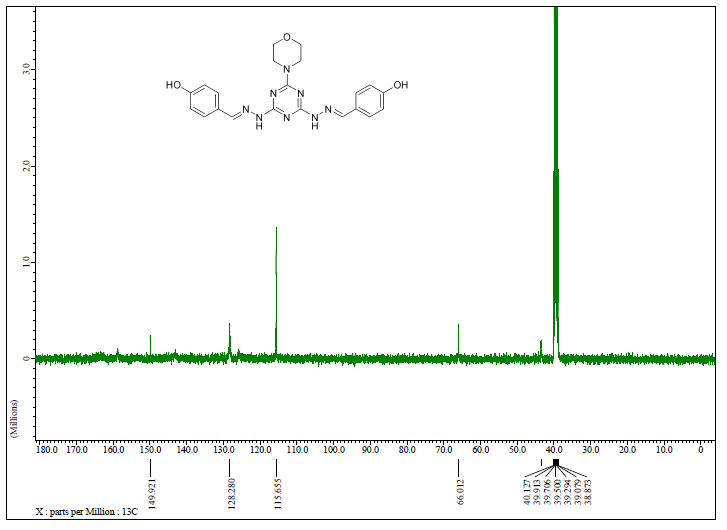


**Figure S28: Supplementary spectrum for compound 6e (1H and 13C)**


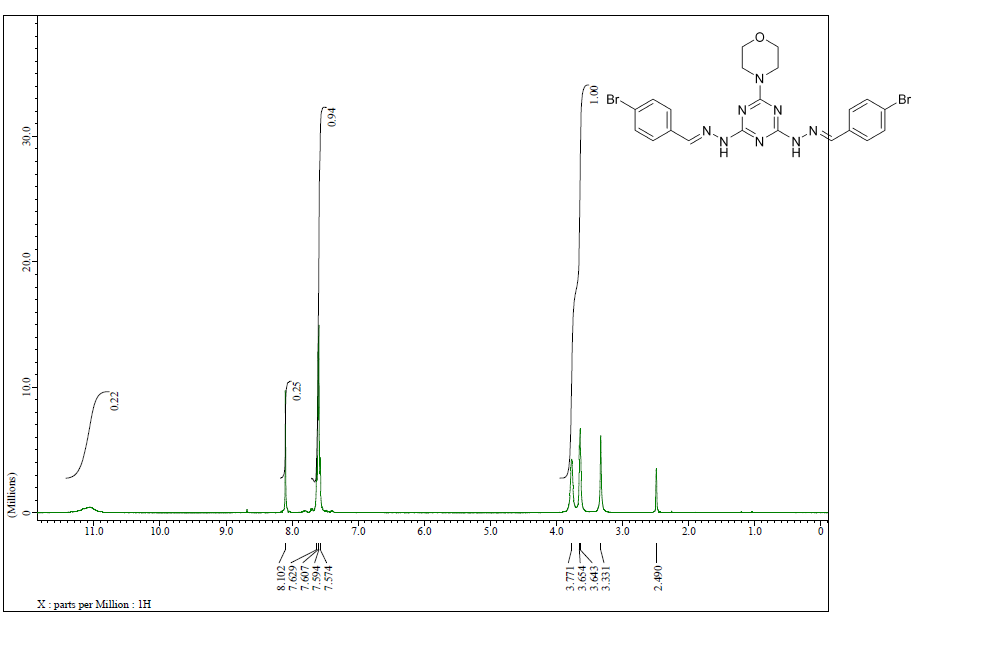


**Figure S29: Supplementary spectrum for compound 6f (1H and 13C)**


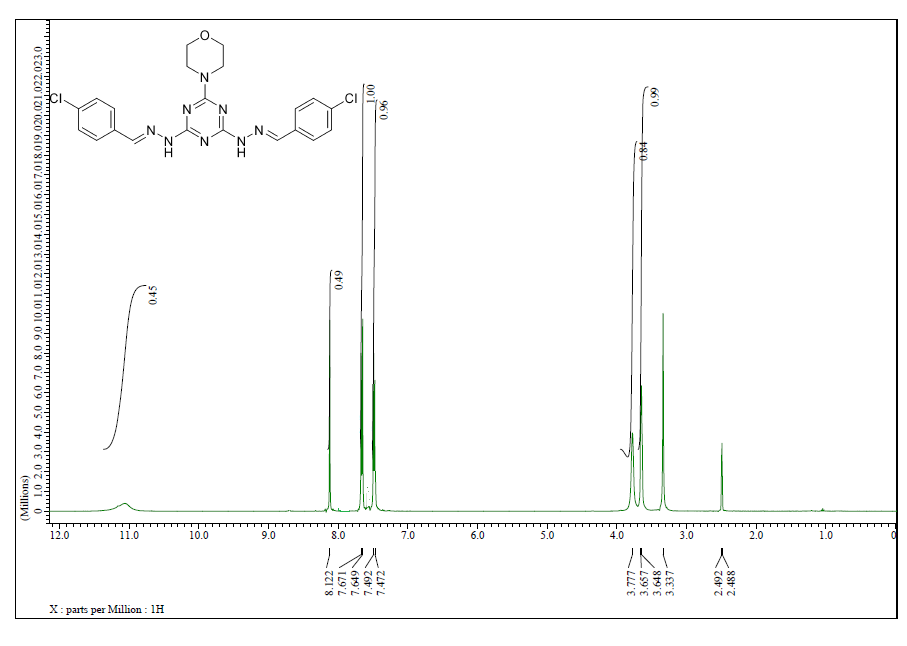


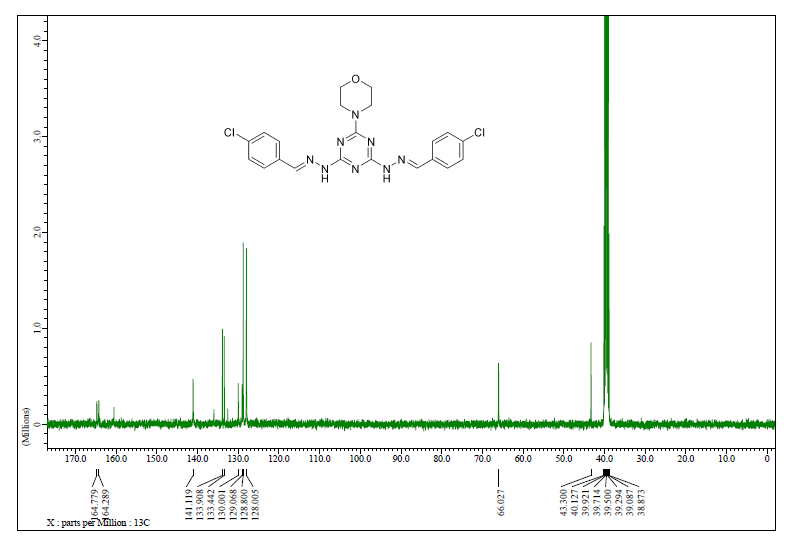


**Figure S30: Supplementary spectrum for compound 6g (1H and 13C)**


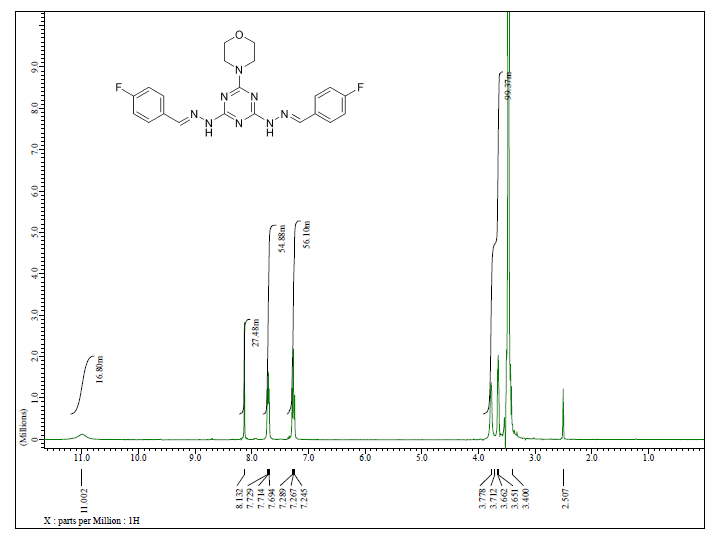


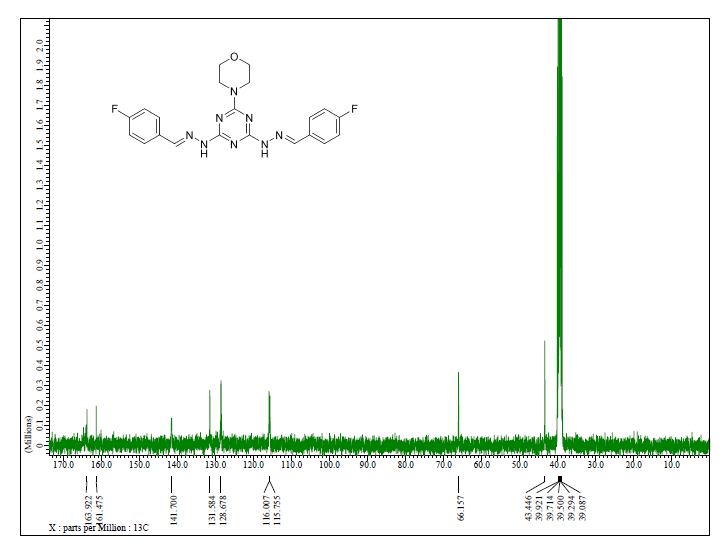


**Figure S31: Supplementary spectrum for compound 6h (1H and 13C)**


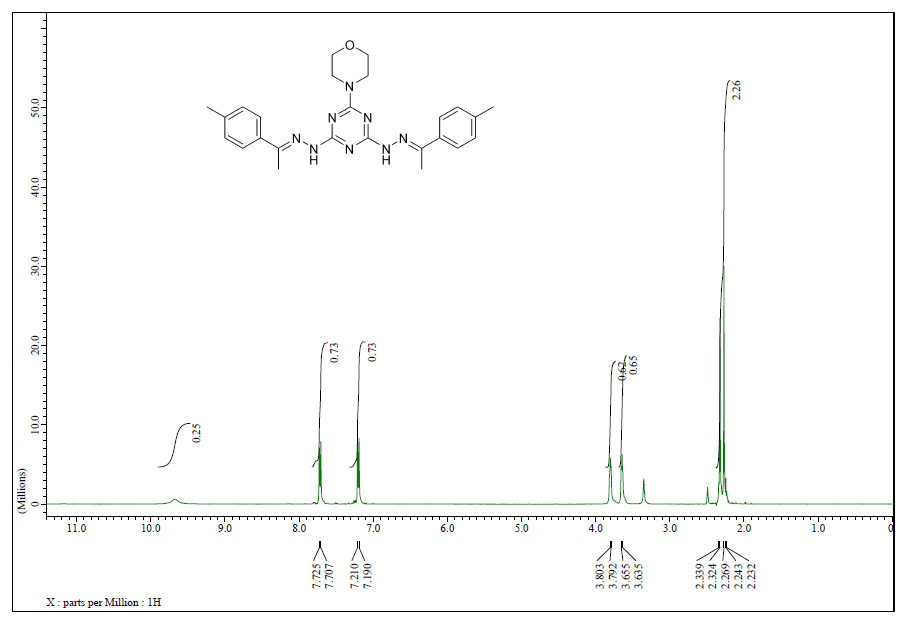


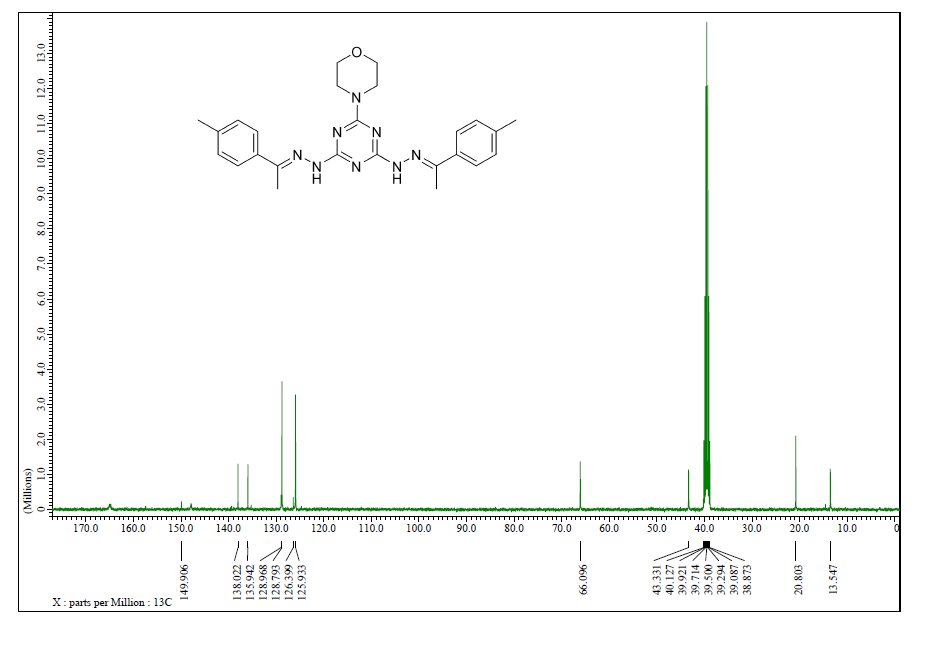


**Figure S32: Supplementary spectrum for compound 6i (1H and 13C)**


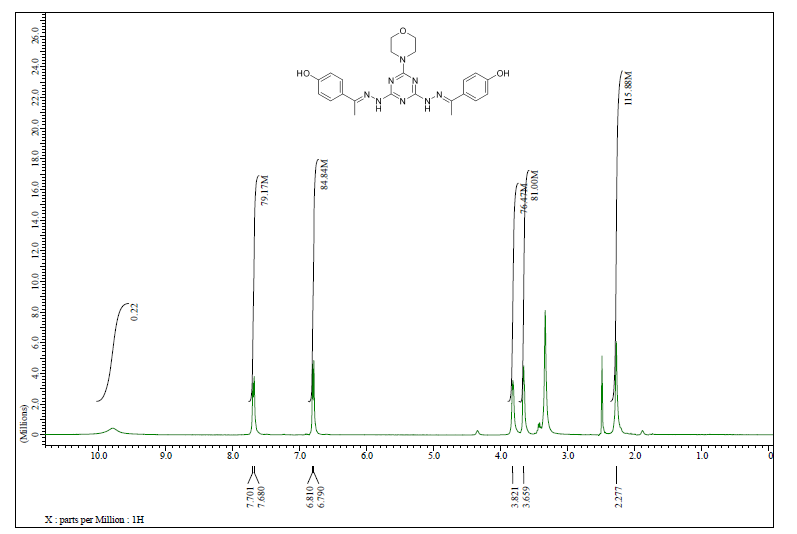


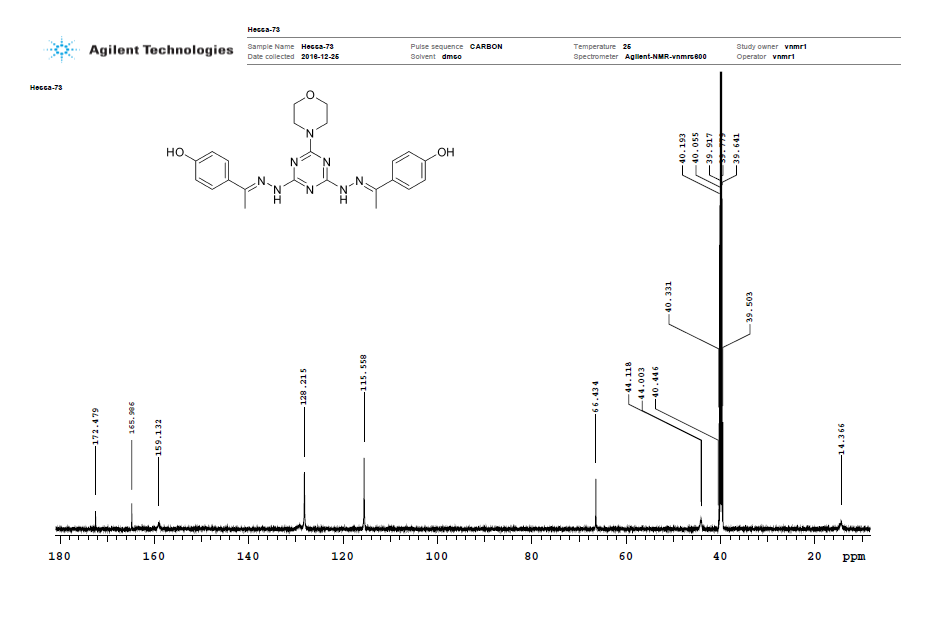


**Figure S33: Supplementary spectrum for compound 7a (1H and 13C)**


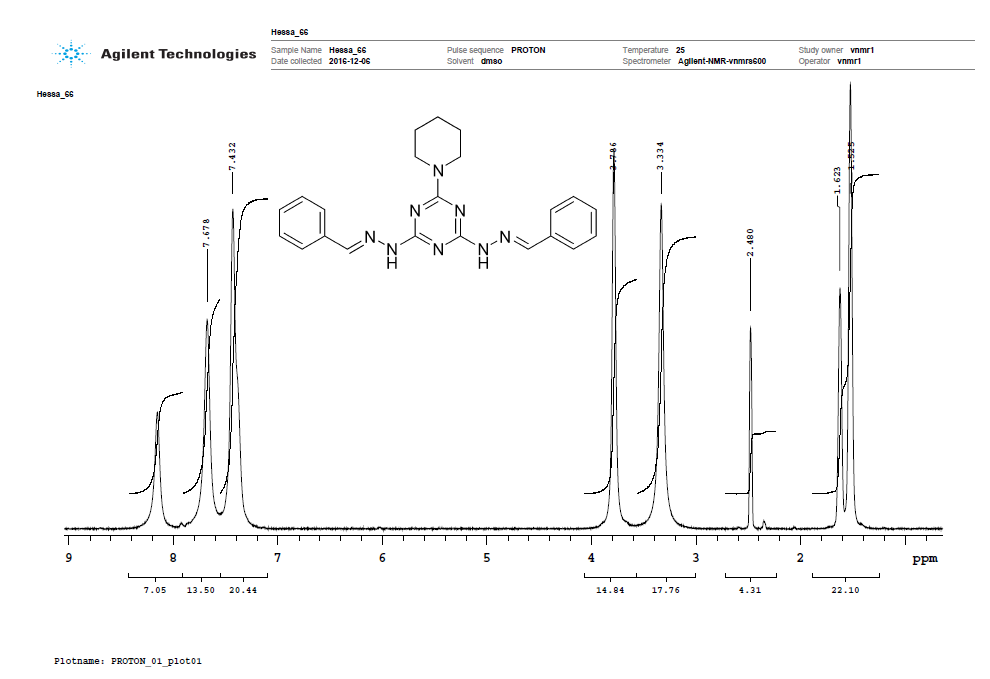


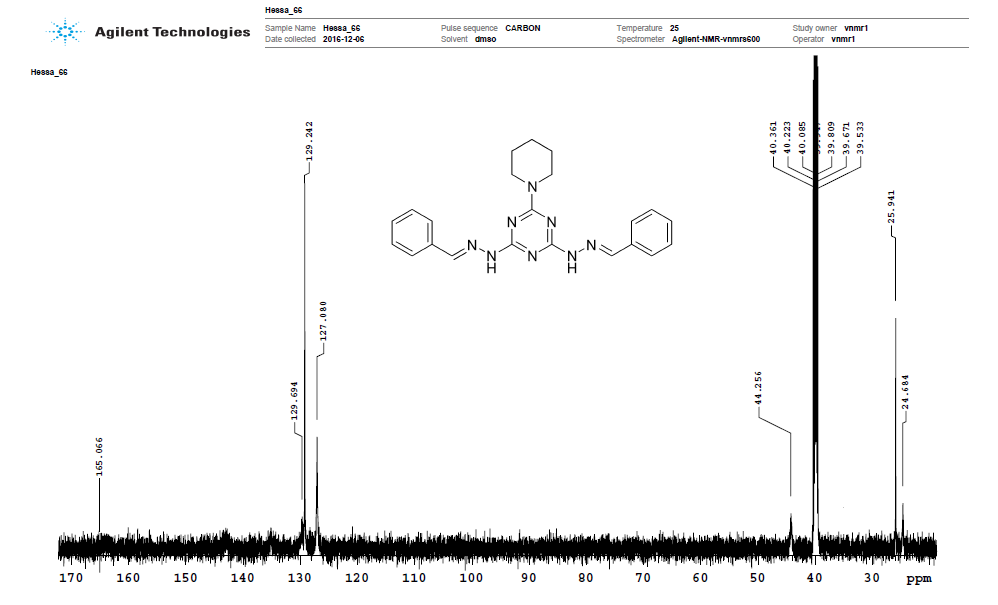


**Figure S34: Supplementary spectrum for compound 7b (1H and 13C)**


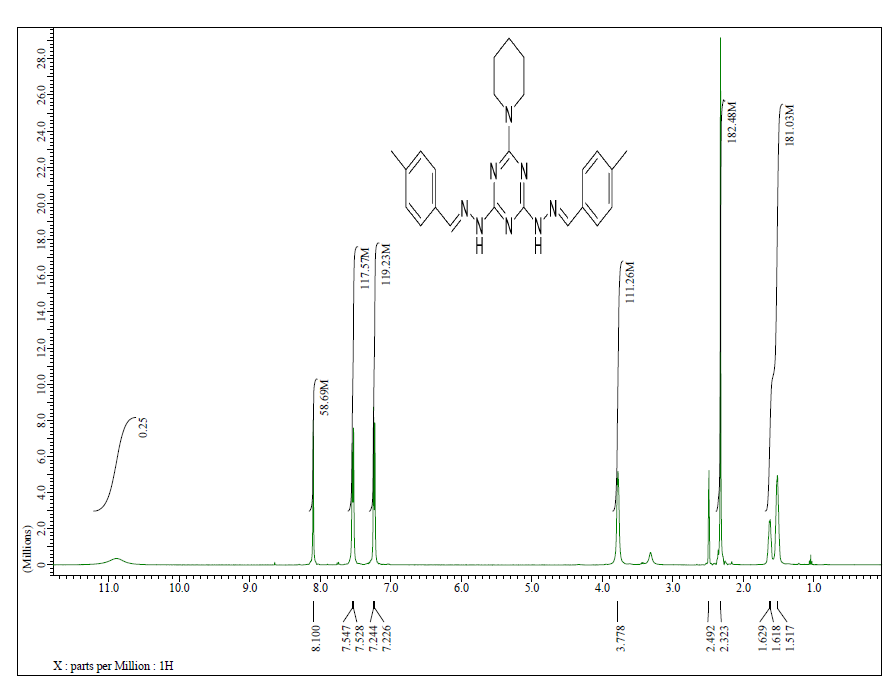


**Figure S35: Supplementary spectrum for compound 7c (1H and 13C)**


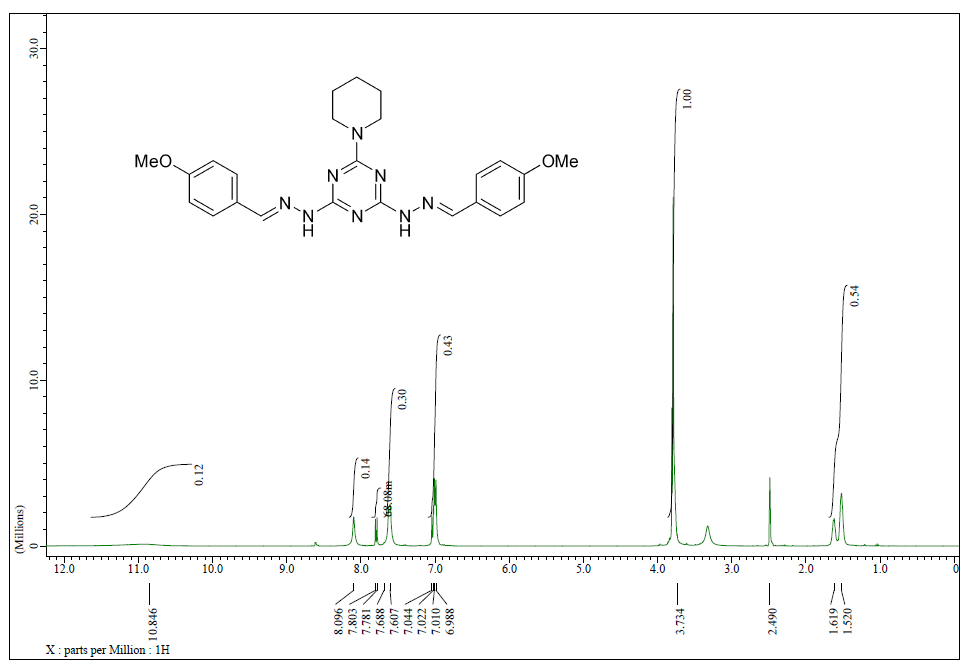


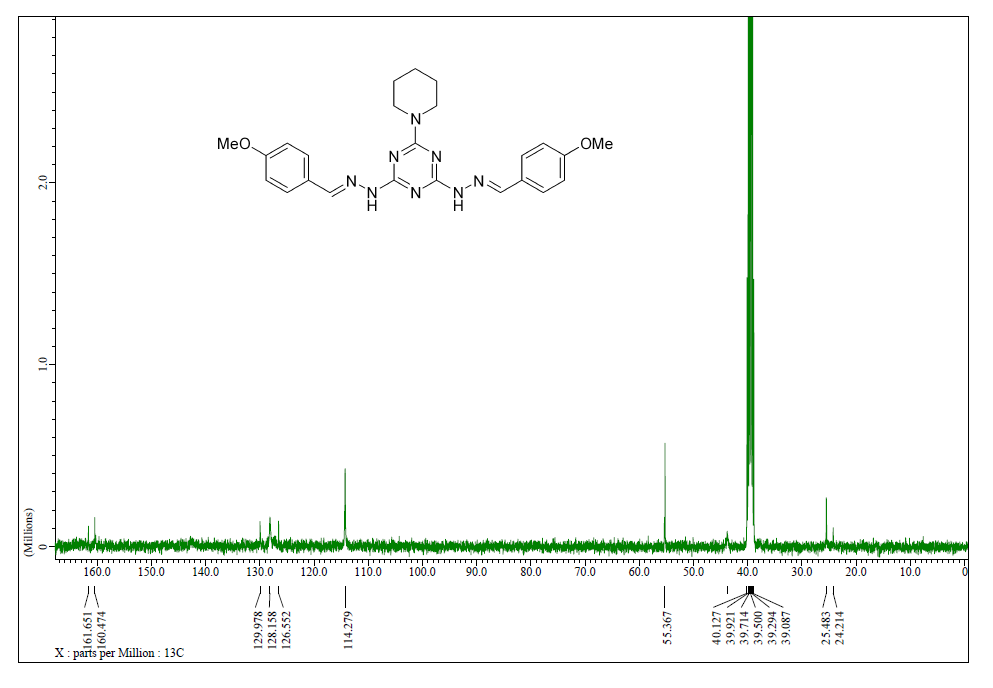


**Figure S36: Supplementary spectrum for compound 7d (1H NMR)**


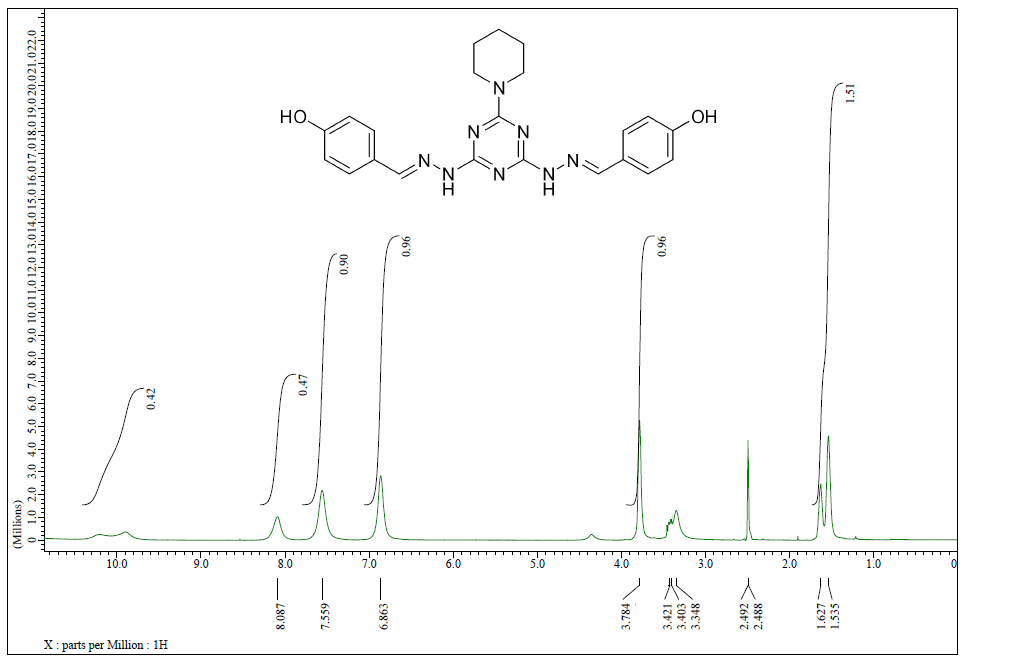


**Figure S37: Supplementary spectrum for compound 7e (1H and 13C)**


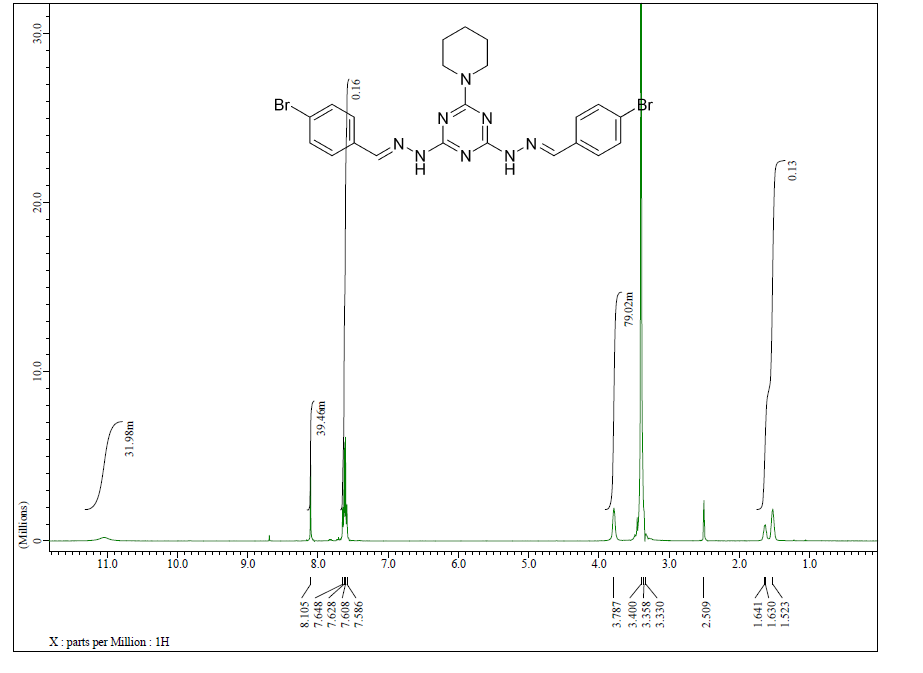


**Figure S38: Supplementary spectrum for compound 7f (1H and 13C)**


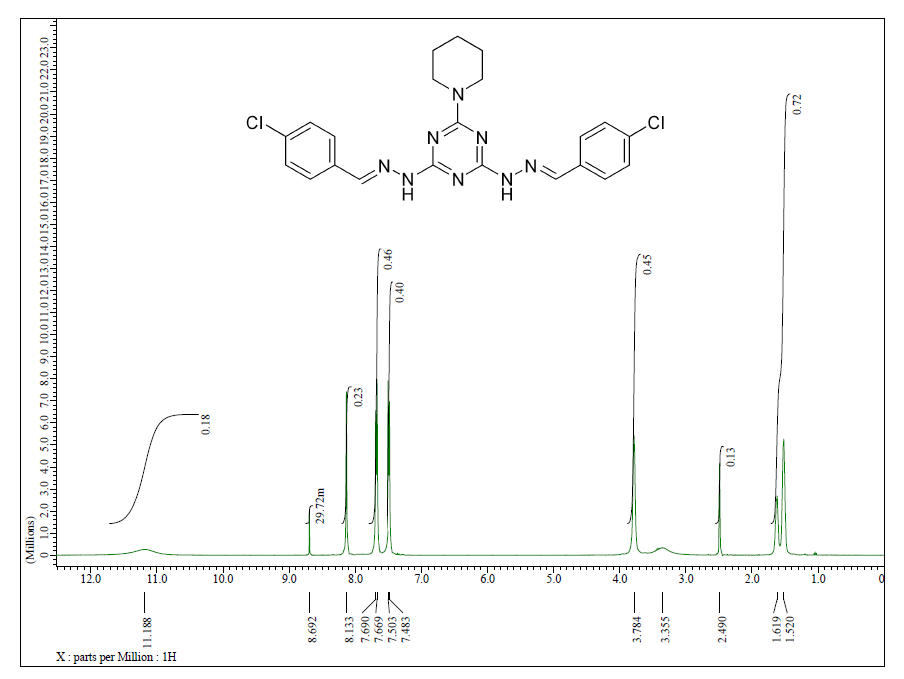


**Figure S39: Supplementary spectrum for compound 7g (1H and 13C)**


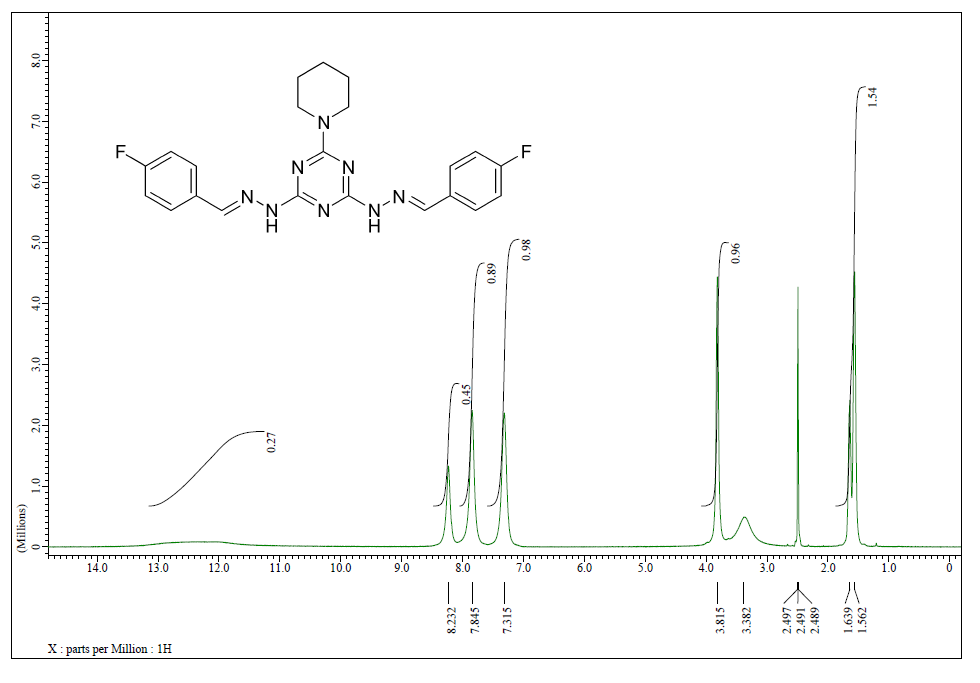


**Figure S40: Supplementary spectrum for compound 7h (1H and 13C)**


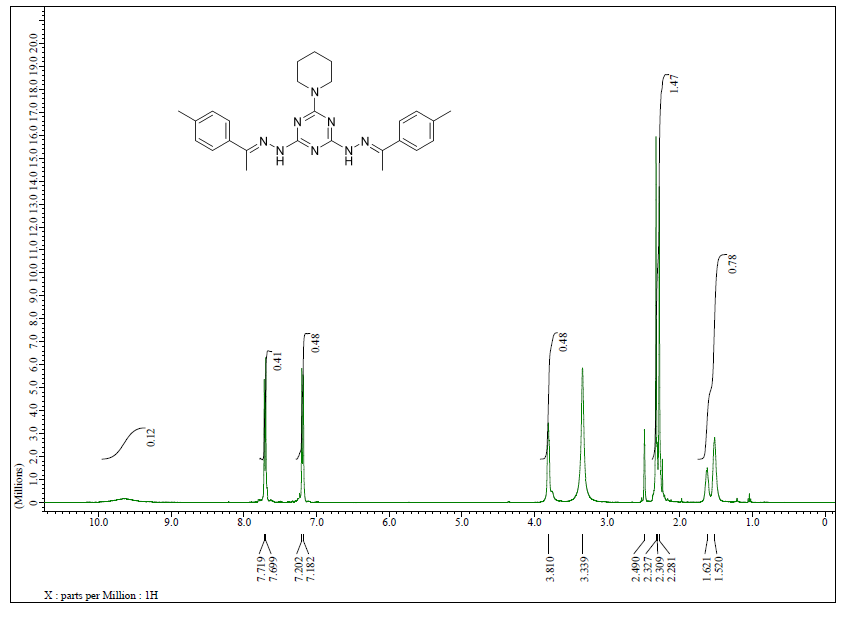


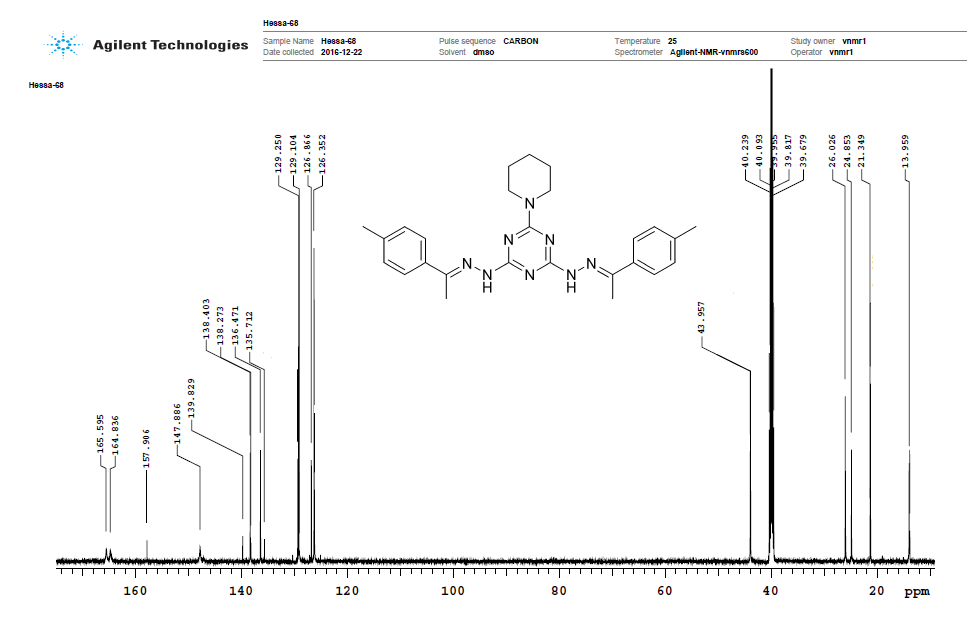


**Figure S41: Supplementary spectrum for compound 7i (1H and 13C)**

**Figure S42: LC-MS for compound 7i**

**Figure S43: Supplementary spectrum for compound 8a (1H and 13C)**


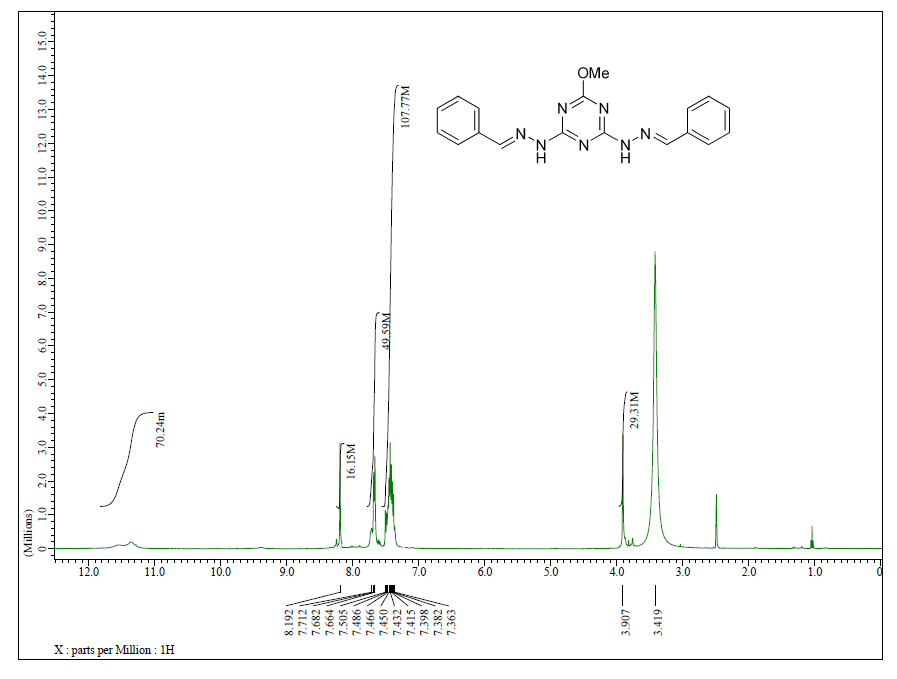


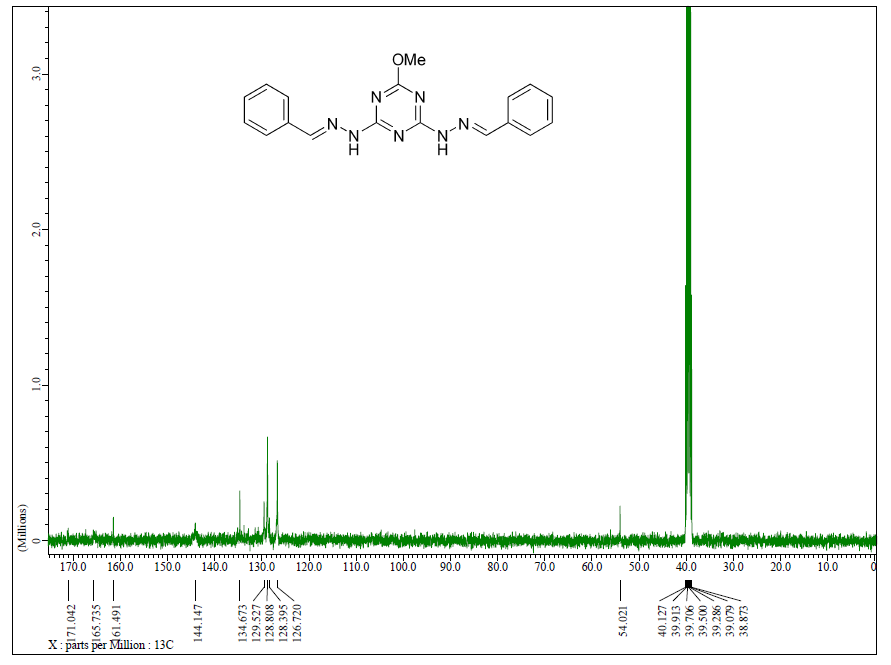


**Figure S44: Supplementary spectrum for compound 8b (1H and 13C)**


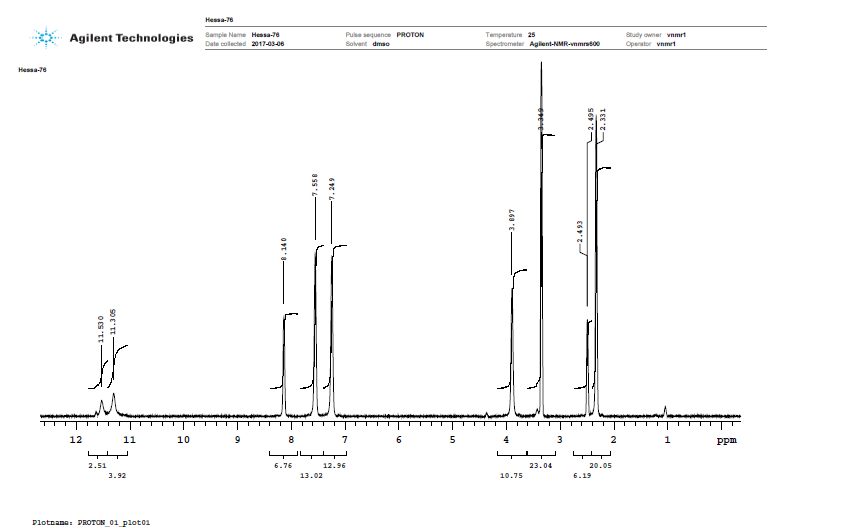


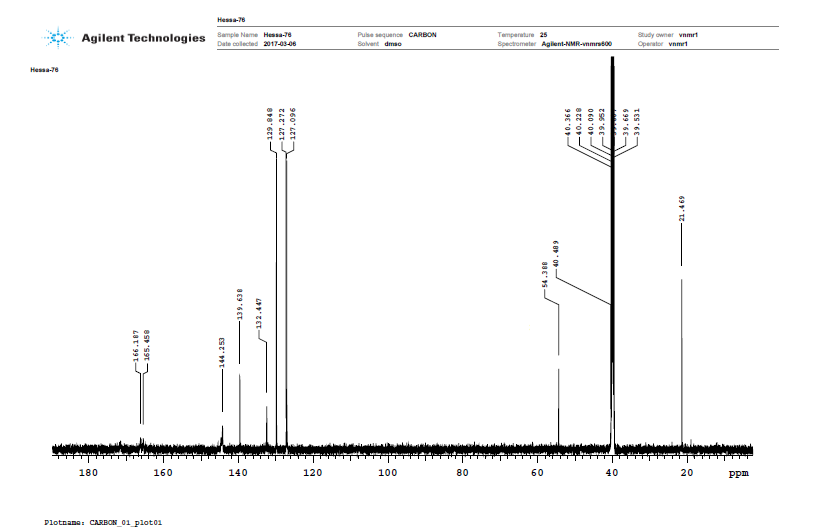


**Figure S45: Supplementary spectrum for compound 8c (1H and 13C)**


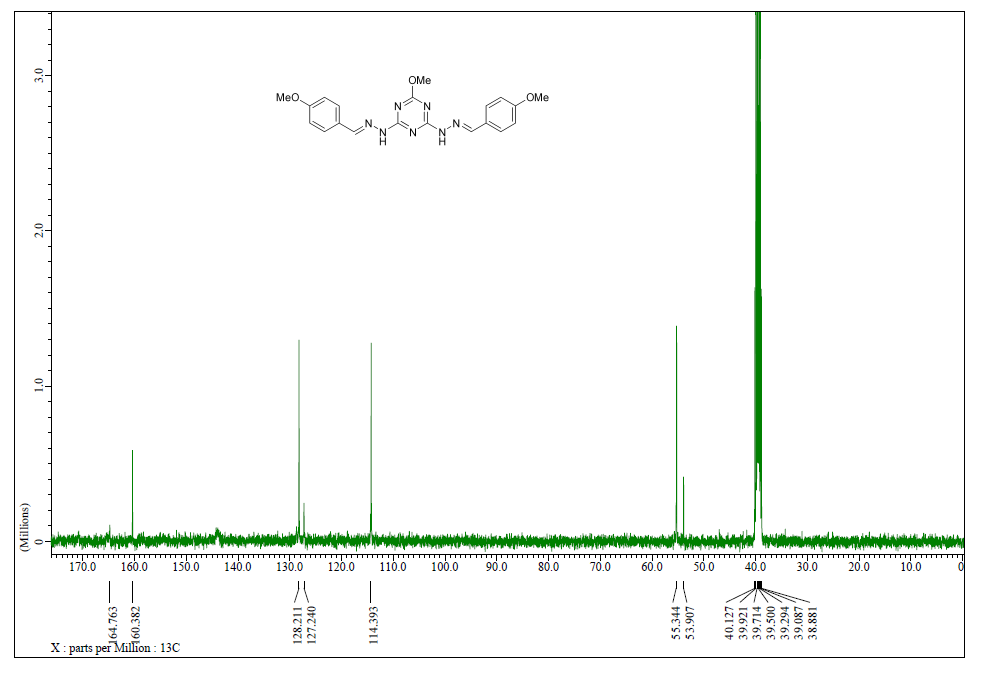


**Figure S46: Supplementary spectrum for compound 8d (1H and 13C)**


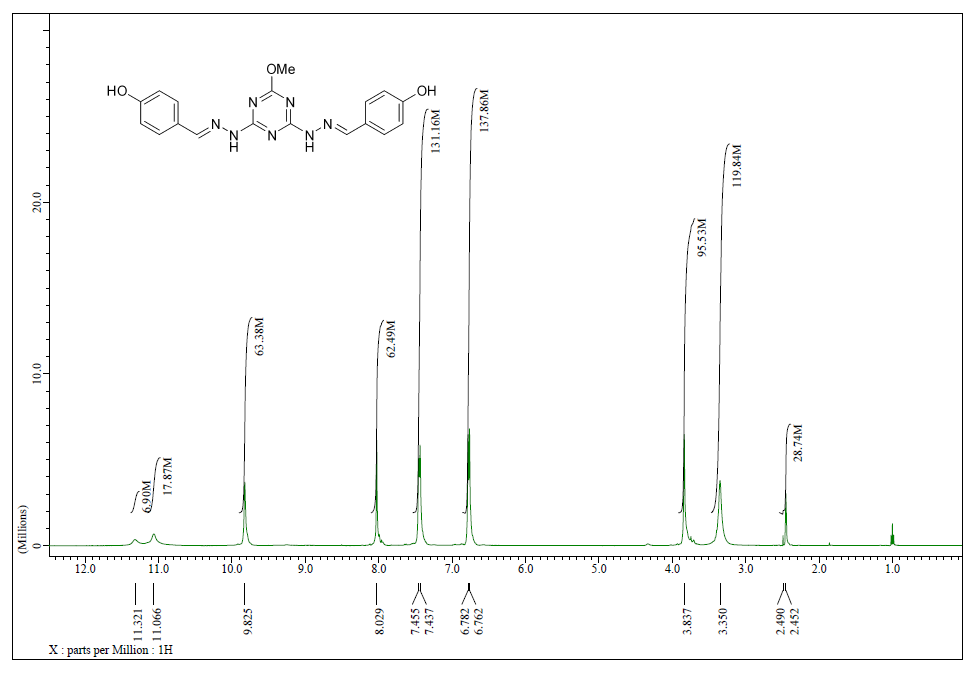


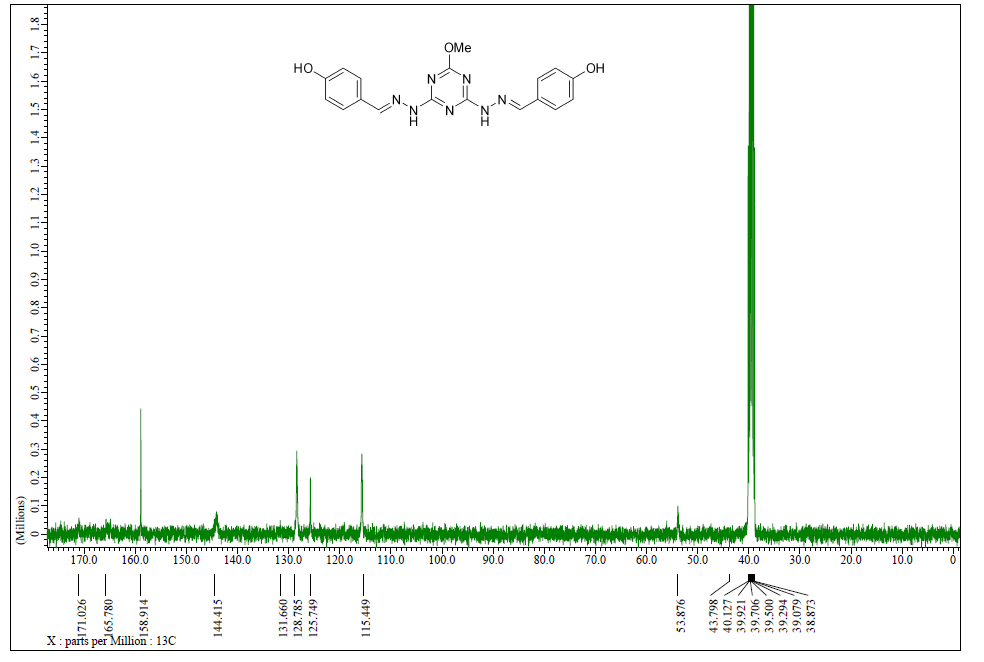


**Figure S47: Supplementary spectrum for compound 8e (1H and 13C)**


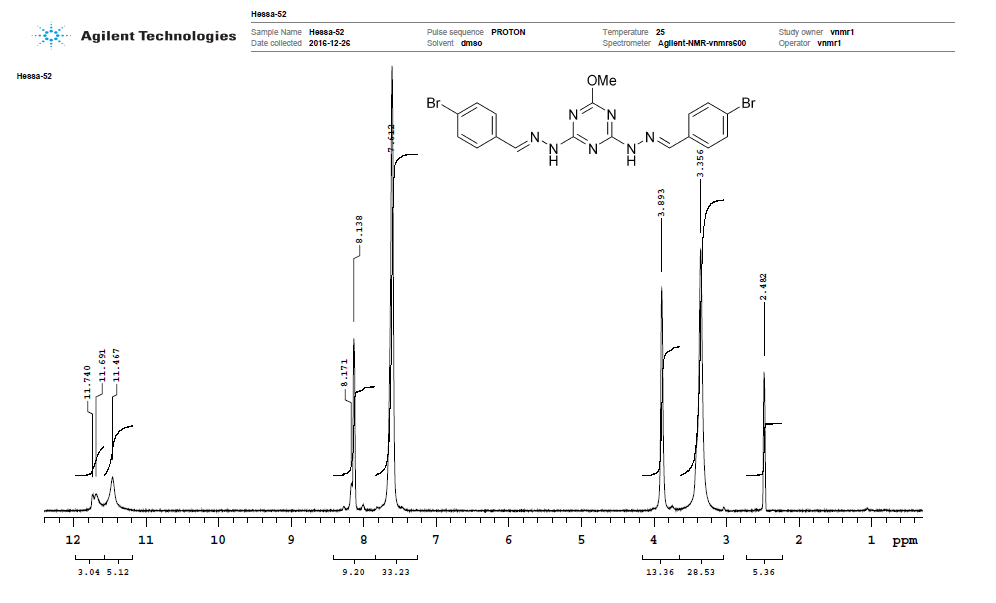


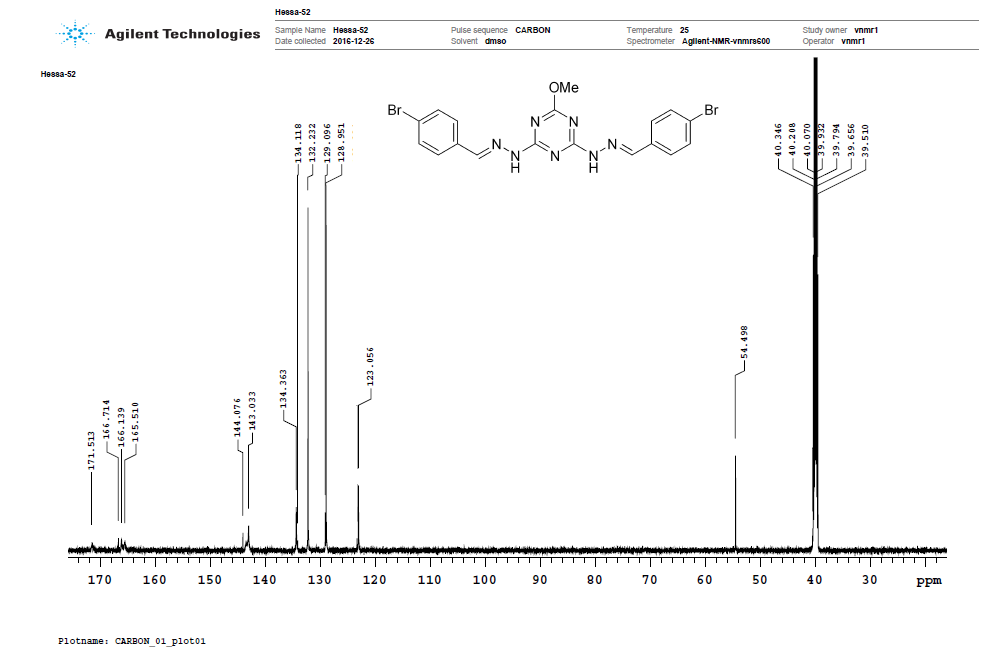


**Figure S48: Supplementary spectrum for compound 8f (1H and 13C)**


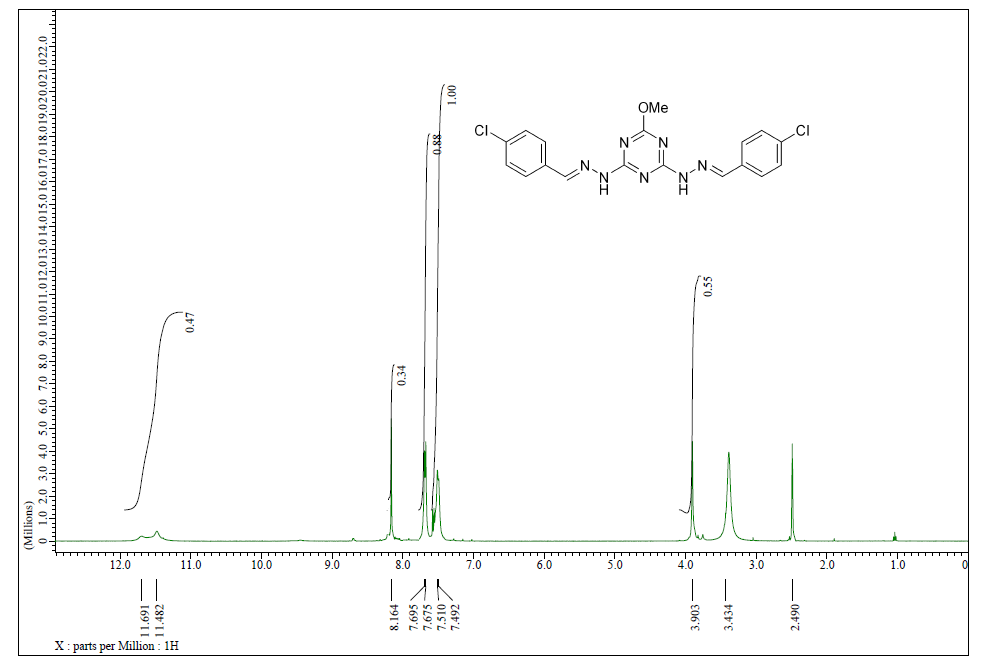


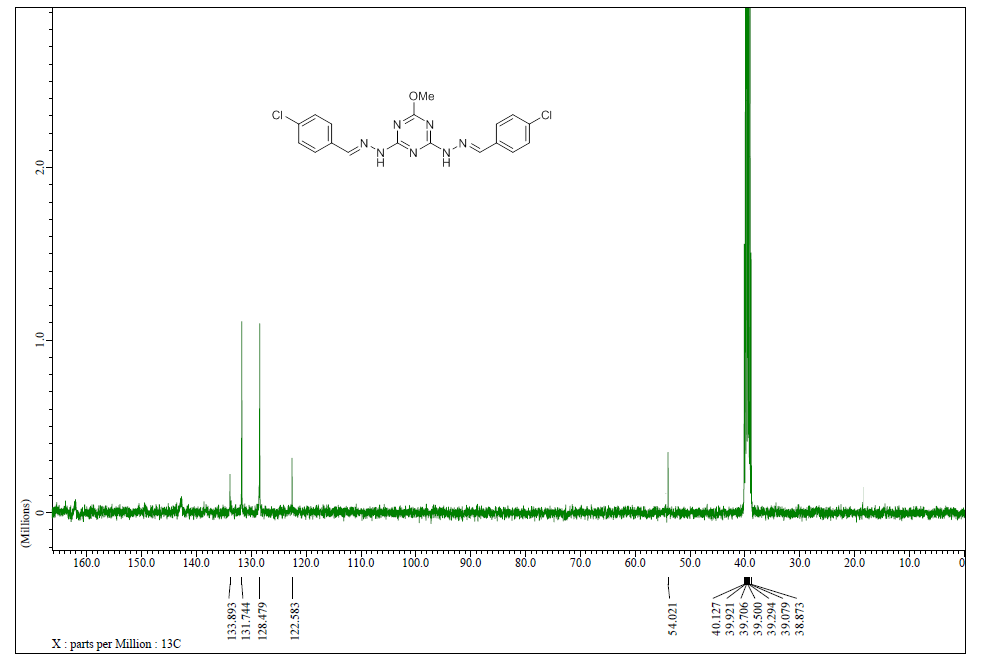


**Figure S49: Supplementary spectrum for compound 8g (1H and 13C)**


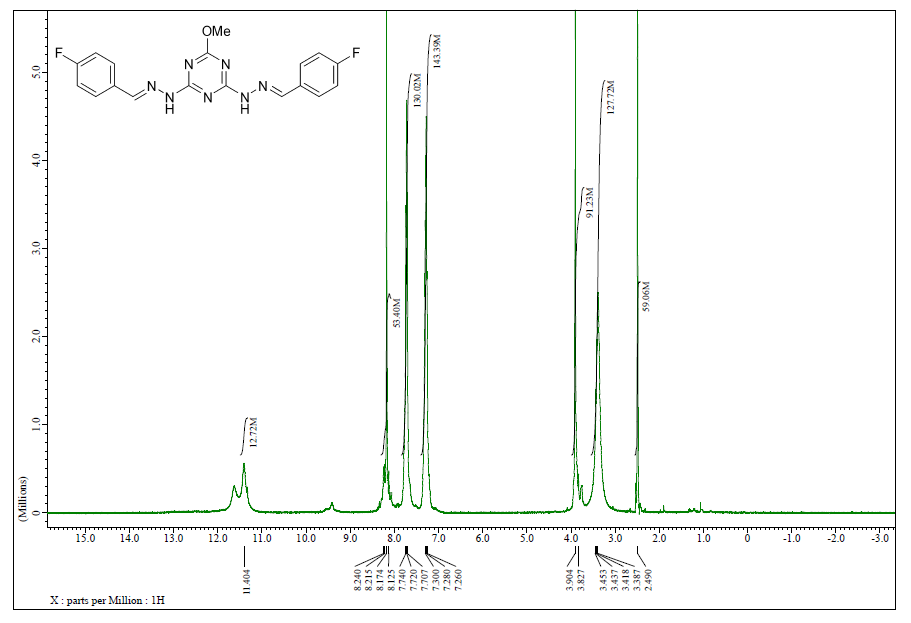


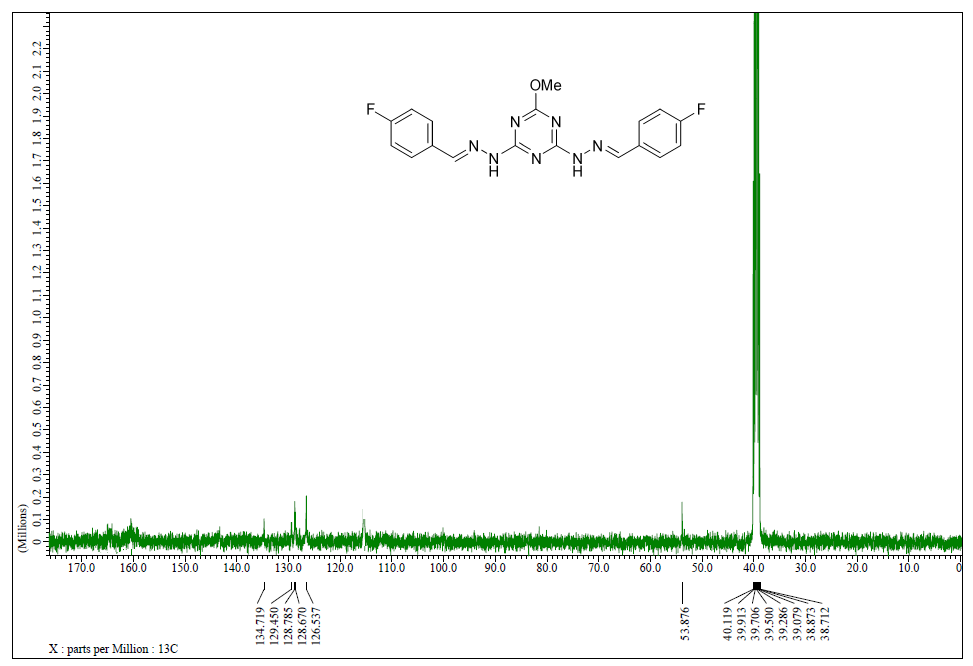


**Figure S50: LC-MS for 7a**

**Figure S51: LC-MS for 7d**

**Figure S51: LC-MS for 7f**
